# Supplementary material for: Utility of molecular subtypes and genetic alterations for evaluating clinical outcomes in 1029 patients with endometrial cancer
Source: PubMed Central journal article supplement (PMC10070437; doi:10.1038/s41416-023-02203-3), 2023-02-16
Supplement: 41416_2023_2203_MOESM1_ESM.pdf [file 41416_2023_2203_MOESM1_ESM.pdf]

## 1 Utility of molecular subtypes and genetic alterations for evaluating clinical 2 outcomes in 1,029 patients with endometrial cancer

3 Asami Y et al.

### 4 5 **Supplementary Methods**

#### 6 **Quality control for next-generation sequencing in the NCCH cohort**

7 Genomic DNA was extracted from 265 formalin-fixed paraffin-  
8 embedded (FFPE) tumor tissues using a QIAamp DNA FFPE tissue kit according  
9 to the manufacturer's instructions (Qiagen, Hilden, Germany). Eighteen of the  
10 265 samples consisted of low-quality DNA extracted from FFPE-derived tumor  
11 tissues, thus DNA was extracted from snap-frozen tumor tissues using a QIAamp  
12 DNA Mini Kit. Purified genomic DNA obtained from tumor tissues (50 ng) was  
13 used for library construction using the Ion AmpliSeq™ Cancer Hotspot Panel v2  
14 (Thermo Fisher Scientific, Waltham, MA, USA), which targets approximately  
15 2,800 COSMIC mutational hotspot regions of 50 cancer-related genes. Sequencing  
16 was performed using the Ion Proton platform (Thermo Fisher Scientific). An Ion  
17 AmpliSeq™ Custom Panel, which was designed for *PTEN* (coverage rate: 89.2%),  
18 *ARID1A* (coverage rate: 97.3%), *TP53* (coverage rate: 100%), *POLE* (coverage rate:  
19 100%), *PIK3R1* (coverage rate: 99.6%), and *PPP2R1A* genes (coverage rate: 100%)  
20 using Ion AmpliSeq™ Designer (<https://www.ampliseq.com>), was also used  
21 (Solution ID: IAD191594\_167). For sample quality control, samples with a mean  
22 read depth coverage >1000 and a base quality score of 20 (i.e., with a ≤1%  
23 probability of being incorrect), which accounted for 90% (Cancer Hotspot Panel)/  
24 75% (Custom Panel) of the total reads, were selected. Pathological variants in the  
25 50 cancer-related genes were defined using the same criteria as reported  
26 previously (1-4), and “high-impact variants” such as frameshift, stop gain, stop  
27 loss, and start loss were defined in SnpEff v4.3 (5) for all exon sequences in the  
28 Ion AmpliSeq™ Custom Panel, in addition to pathogenic/oncogenic variants in  
29 the ClinVar (6) and OncoKB (7) databases.

#### 30 31 **Immunohistochemistry (IHC) for protein 53 (p53) and mismatch repair (MMR) 32 protein in the NCCH cohort**

33 All surgically resected specimens were fixed in 10% neutral-buffered  
34 formalin for 24–72 h and embedded in paraffin. Representative whole 4 μm-thick  
35 sections were analyzed using IHC. The following antibodies were used for IHC

36 on representative slides for each case: anti-p53 (DO7, pre-diluted; Dako, Glostrup,  
37 Denmark), anti-hMLH1 (ES05, 1:200 dilution; Dako), anti-hMSH2 and anti-  
38 hMSH6 (SP93, 1:200 dilution; Spring Bioscience, CA, USA), and anti-hPMS2  
39 (A16-4, 1:200 dilution; Biocare Medical, CA, USA). All IHC assays were  
40 performed using a Dako autostainer (Dako), according to the manufacturer's  
41 instructions. After deparaffinization, the tissue sections were stained using the  
42 antibodies indicated above and counterstained with hematoxylin. An aberrant  
43 p53 staining pattern was defined as a strong and diffuse nuclear staining pattern  
44 (> 80% of carcinoma cells) or completely negative ("null pattern") staining of  
45 carcinoma cells, with appropriate staining of the surrounding non-tumor cells as  
46 an internal positive control. A weak and heterogeneous staining pattern of the  
47 tumor cells was classified as wild type (8). Since IHC for PMS2 and MSH6 alone  
48 can reportedly replace the four antibody panels (comprising MLH1, MSH2,  
49 MSH6, and PMS2) for deficient MMR screening (9,10), MMR-deficient status was  
50 defined as the complete loss of nuclear staining for PMS2 and/or MSH6 proteins.  
51 Adjacent normal mucosa, stromal cells, and inflammatory cells with intact  
52 nuclear staining served as internal positive controls.

53

#### 54 **Identification of novel stratified genes in the NSMP group in the NCCH cohort**

55 Among the recurrent mutated genes for which subgroup analysis was  
56 possible, we first identified single genes significantly associated with prognosis.  
57 Then, we investigated combinations that could be better stratified for prognosis  
58 than single genes, resulting in the selection of *ARID1A* (36.9%) and *KRAS* (27.2%).

59

#### 60 **Genome profiling data obtained from the Center for Cancer Genomics and** 61 **Advanced Therapeutics (C-CAT) database**

62 The genomic profiles of 922 advanced endometrial carcinoma cases were  
63 obtained by controlled access to the C-CAT database for this study (11,12). The  
64 profiles were obtained with two comprehensive genomic profiling tests  
65 approved by the Pharmaceuticals and Medical Devices Agency: FoundationOne  
66 CDx, which can detect somatic mutations in 324 genes, and NCC Oncopanel,  
67 which detected somatic and germline mutations in 114 genes. The study protocol  
68 was approved by the Institutional Review Board of the National Cancer Center  
69 Research Institute (approval number 2020-067), followed by the approval of the  
70 C-CAT Data Utilization Review Board (approval number CDU2021-001N), and  
71 the study was conducted in accordance with the ethical guidelines of the

72 Declaration of Helsinki. The COSMIC (version 87) and Clinvar (20190114)  
73 databases were used to annotate each gene aberration. Somatic mutations were  
74 counted if they were defined as "pathogenic/likely pathogenic variants" or  
75 "oncogenic/likely oncogenic variants".

76

### 77 **Molecular classifiers in each cohort**

78 The molecular classification was determined based on IHC for the NCCH  
79 cohort and sequencing data provided by the Foundation (FoundationOne CDx  
80 or NCC Oncopanel) for the C-CAT cohort. The molecular classification of each  
81 cohort is shown in below.

| Subtype                 | Molecular classification<br>(NCCH cohort)                            | Sequence-based classification<br>(C-CAT cohort) |
|-------------------------|----------------------------------------------------------------------|-------------------------------------------------|
| <i>POLE</i> -EDM        | Pathogenic/oncogenic variants detected within the exonuclease domain |                                                 |
| MMR-D/MSI-H             | IHC                                                                  | MSI-H by each panel test                        |
| p53abn/ <i>TP53</i> mut | IHC                                                                  | Pathogenic/Oncogenic variants                   |
| NSMP                    | The remainder are currently classified as NSMP                       |                                                 |

82

### 83 **Comparison of genetic alterations between the NCCH and the C-CAT cohorts**

84 In the NCCH cohort, several genes (e.g., *PIK3CA*, *KRAS*, and *ATM*) were  
85 targeted only to the hotspot using the Ion AmpliSeq™ cancer hotspot panel v2;  
86 thus, comparisons of genetic alterations between the two cohorts for these genes  
87 were aligned to the hotspots BED region.

88

89 Reference:

- 90 1. Hirose S, Murakami N, Takahashi K, Kuno I, Takayanagi D, Asami Y, *et al.*  
91 Genomic alterations in STK11 can predict clinical outcomes in cervical  
92 cancer patients. *Gynecol Oncol* 2020;**156**(1):203-10.
- 93 2. Kuno I, Takayanagi D, Asami Y, Murakami N, Matsuda M, Shimada Y, *et*  
94 *al.* TP53 mutants and non-HPV16/18 genotypes are poor prognostic factors  
95 for concurrent chemoradiotherapy in locally advanced cervical cancer. *Sci*  
96 *Rep* 2021;**11**(1):19261.
- 97 3. Murakami N, Asami Y, Yoshida H, Takayanagi D, Hirose S, Kuno I, *et al.*  
98 Distribution of genetic alterations in high-risk early-stage cervical cancer  
99 patients treated with postoperative radiation therapy. *Sci Rep*  
100 2021;**11**(1):10567.
- 101 4. Takayanagi D, Hirose S, Kuno I, Asami Y, Murakami N, Matsuda M, *et al.*  
102 Comparative Analysis of Genetic Alterations, HPV-Status, and PD-L1  
103 Expression in Neuroendocrine Carcinomas of the Cervix. *Cancers (Basel)*  
104 2021;**13**(6):1215.
- 105 5. Cingolani P, Platts A, Wang le L, Coon M, Nguyen T, Wang L, *et al.* A  
106 program for annotating and predicting the effects of single nucleotide  
107 polymorphisms, SnpEff: SNPs in the genome of *Drosophila melanogaster*  
108 strain w1118; iso-2; iso-3. *Fly (Austin)* 2012;**6**(2):80-92.
- 109 6. Landrum MJ, Lee JM, Benson M, Brown GR, Chao C, Chitipiralla S, *et al.*  
110 ClinVar: improving access to variant interpretations and supporting  
111 evidence. *Nucleic Acids Res* 2018;**46**(D1):D1062-D7.
- 112 7. Chakravarty D, Gao J, Phillips SM, Kundra R, Zhang H, Wang J, *et al.*  
113 OncoKB: A Precision Oncology Knowledge Base. *JCO Precis Oncol*  
114 2017;**2017**:PO.17.00011.
- 115 8. Talhouk A, McConechy MK, Leung S, Li-Chang HH, Kwon JS, Melnyk N,  
116 *et al.* A clinically applicable molecular-based classification for endometrial  
117 cancers. *Br J Cancer* 2015;**113**(2):299-310.
- 118 9. Hall G, Clarkson A, Shi A, Langford E, Leung H, Eckstein RP, *et al.*  
119 Immunohistochemistry for PMS2 and MSH6 alone can replace a four  
120 antibody panel for mismatch repair deficiency screening in colorectal  
121 adenocarcinoma. *Pathology* 2010;**42**(5):409-13.
- 122 10. Mojtahed A, Schrijver I, Ford JM, Longacre TA, Pai RK. A two-antibody  
123 mismatch repair protein immunohistochemistry screening approach for  
124 colorectal carcinomas, skin sebaceous tumors, and gynecologic tract

- 125 carcinomas. *Mod Pathol* 2011;**24**(7):1004-14.
- 126 11. Mukai Y, Ueno H. Establishment and implementation of Cancer Genomic  
127 Medicine in Japan. *Cancer Sci* 2021;**112**(3):970-7.
- 128 12. Ebi H, Bando H. Precision Oncology and the Universal Health Coverage  
129 System in Japan. *JCO Precis Oncol* 2019;**3**:PO.19.00291.
- 130

Supplementary Table S1. Patient characteristics according to molecular subtypes in NCCH cohort.

| Characteristics                          | All     |           | POLE-EDM |            | MMR-D  |           | NSMP    |           | p53abn |           | P value            |
|------------------------------------------|---------|-----------|----------|------------|--------|-----------|---------|-----------|--------|-----------|--------------------|
|                                          | [n=265] | ( % )     | [n=36]   | ( 13.6% )  | [n=70] | ( 26.4% ) | [n=103] | ( 38.9% ) | [n=56] | ( 21.1% ) |                    |
| Clinicopathological parameters           |         |           |          |            |        |           |         |           |        |           |                    |
| Age [year] (median,range)                | 57      | ( 28-89 ) | 56       | ( 38-80 )  | 54     | ( 28-89 ) | 56      | ( 29-86 ) | 65     | ( 35-84 ) | <0.001*            |
| Histological types                       |         |           |          |            |        |           |         |           |        |           | <0.001**           |
| Endometrioid                             |         |           |          |            |        |           |         |           |        |           |                    |
| Grade 1                                  | 92      | ( 34.7% ) | 13       | ( 36.0% )  | 21     | ( 30.0% ) | 54      | ( 52.4% ) | 4      | ( 7.1% )  |                    |
| Grade 2                                  | 30      | ( 11.3% ) | 2        | ( 5.6% )   | 10     | ( 14.3% ) | 17      | ( 16.5% ) | 1      | ( 1.8% )  |                    |
| Grade 3                                  | 76      | ( 28.7% ) | 17       | ( 47.2% )  | 31     | ( 44.3% ) | 17      | ( 16.5% ) | 11     | ( 19.7% ) |                    |
| Carcinosarcoma                           | 23      | ( 8.7% )  | 1        | ( 2.8% )   | 2      | ( 2.9% )  | 6       | ( 5.8% )  | 14     | ( 25.0% ) |                    |
| Serous                                   | 18      | ( 6.8% )  | 0        | ( 0.0% )   | 1      | ( 1.4% )  | 1       | ( 1.0% )  | 16     | ( 28.6% ) |                    |
| Clear                                    | 12      | ( 4.4% )  | 1        | ( 2.8% )   | 0      | ( 0.0% )  | 7       | ( 6.8% )  | 4      | ( 7.1% )  |                    |
| Mixed                                    | 11      | ( 4.2% )  | 2        | ( 5.6% )   | 4      | ( 5.7% )  | 0       | ( 0.0% )  | 5      | ( 8.9% )  |                    |
| Others                                   | 3       | ( 1.2% )  | 0        | ( 0.0% )   | 1      | ( 1.4% )  | 1       | ( 1.0% )  | 1      | ( 1.8% )  |                    |
| FIGO (2008) stage                        |         |           |          |            |        |           |         |           |        |           | 0.065**            |
| IA                                       | 99      | ( 37.4% ) | 20       | ( 55.6% )  | 26     | ( 37.2% ) | 34      | ( 33.0% ) | 19     | ( 33.9% ) |                    |
| IB                                       | 41      | ( 15.5% ) | 6        | ( 16.7% )  | 13     | ( 18.6% ) | 16      | ( 15.5% ) | 6      | ( 10.7% ) |                    |
| II                                       | 22      | ( 8.3% )  | 3        | ( 8.3% )   | 5      | ( 7.1% )  | 12      | ( 11.6% ) | 2      | ( 3.6% )  |                    |
| IIIA                                     | 16      | ( 6.0% )  | 0        | ( 0.0% )   | 3      | ( 4.3% )  | 7       | ( 6.8% )  | 6      | ( 10.7% ) |                    |
| IIIB                                     | 4       | ( 1.5% )  | 0        | ( 0.0% )   | 1      | ( 1.4% )  | 1       | ( 1.0% )  | 2      | ( 3.6% )  |                    |
| IIIC                                     | 58      | ( 21.9% ) | 7        | ( 19.4% )  | 17     | ( 24.3% ) | 25      | ( 24.3% ) | 9      | ( 16.1% ) |                    |
| IVB                                      | 25      | ( 9.4% )  | 0        | ( 0.0% )   | 5      | ( 7.1% )  | 8       | ( 7.8% )  | 12     | ( 21.4% ) |                    |
| Lymph node metastasis                    |         |           |          |            |        |           |         |           |        |           | 0.823**            |
| Negative                                 | 186     | ( 70.2% ) | 27       | ( 75.0% )  | 50     | ( 71.4% ) | 72      | ( 69.9% ) | 37     | ( 66.1% ) |                    |
| Positive                                 | 79      | ( 29.8% ) | 9        | ( 25.0% )  | 20     | ( 28.6% ) | 31      | ( 30.1% ) | 19     | ( 33.9% ) |                    |
| Myometrial invasion                      |         |           |          |            |        |           |         |           |        |           | 0.321**            |
| <50%                                     | 128     | ( 48.3% ) | 21       | ( 58.3% )  | 37     | ( 52.9% ) | 47      | ( 45.6% ) | 23     | ( 41.1% ) |                    |
| ≥50%                                     | 137     | ( 51.7% ) | 15       | ( 41.7% )  | 33     | ( 47.1% ) | 56      | ( 54.4% ) | 33     | ( 58.9% ) |                    |
| Lymph vascular space invasion            |         |           |          |            |        |           |         |           |        |           | 0.521**            |
| Negative                                 | 111     | ( 41.9% ) | 16       | ( 44.4% )  | 24     | ( 34.3% ) | 46      | ( 44.7% ) | 25     | ( 44.6% ) |                    |
| Positive                                 | 154     | ( 58.1% ) | 20       | ( 55.6% )  | 46     | ( 65.7% ) | 57      | ( 55.3% ) | 31     | ( 55.4% ) |                    |
| Peritoneal cytology                      |         |           |          |            |        |           |         |           |        |           | 0.047**            |
| Negative                                 | 186     | ( 70.2% ) | 31       | ( 86.1% )  | 48     | ( 68.6% ) | 74      | ( 71.8% ) | 33     | ( 58.9% ) |                    |
| Positive                                 | 79      | ( 29.8% ) | 5        | ( 13.9% )  | 22     | ( 31.4% ) | 29      | ( 28.2% ) | 23     | ( 41.1% ) |                    |
| Cervical invasion                        |         |           |          |            |        |           |         |           |        |           | 0.189**            |
| Negative                                 | 202     | ( 76.2% ) | 32       | ( 88.9% )  | 55     | ( 78.6% ) | 75      | ( 72.8% ) | 40     | ( 71.4% ) |                    |
| Positive                                 | 63      | ( 23.8% ) | 4        | ( 11.1% )  | 15     | ( 21.4% ) | 28      | ( 27.2% ) | 16     | ( 28.6% ) |                    |
| Recurrence or progression                |         |           |          |            |        |           |         |           |        |           | <0.001**           |
| None                                     | 192     | ( 72.5% ) | 35       | ( 97.2% )  | 53     | ( 75.7% ) | 77      | ( 74.8% ) | 27     | ( 48.2% ) |                    |
| Recurrence                               | 67      | ( 25.3% ) | 1        | ( 2.8% )   | 16     | ( 22.9% ) | 25      | ( 24.2% ) | 25     | ( 44.6% ) |                    |
| Progression                              | 6       | ( 2.2% )  | 0        | ( 0.0% )   | 1      | ( 1.4% )  | 1       | ( 1.0% )  | 4      | ( 7.2% )  |                    |
| Follow-up period [month] (median, range) | 61      | ( 3-149 ) | 62       | ( 29-135 ) | 63     | ( 3-138 ) | 61      | ( 5-149 ) | 56     | ( 6-114 ) | 0.063 <sup>†</sup> |

\* Mann-Whitney's U test. \*\* Chi-squared test.

NCCH: National Cancer Center Hospital, POLE-EDM: DNA polymerase epsilon exonuclease domain mutation, MMR-D: Mismatch repair protein deficiency, NSMP: no specific molecular profile, p53abn: p53 abnormal expression, FIGO: International Federation of Gynecology and Obstetrics.

Supplementary Table S2. Clinicopathological features of 57 cases with discrepancy between p53 IHC status and *TP53* mutations in NCCH cohort.

| Characteristics           | <i>TP53</i> mut / p53wt |           | <i>TP53</i> wt / p53abn |           | P value |
|---------------------------|-------------------------|-----------|-------------------------|-----------|---------|
|                           | [n=42]                  | ( % )     | [n=15]                  | ( % )     |         |
| Molecular subtype         |                         |           |                         |           | <0.001  |
| <i>POLE</i> -EDM          | 12                      | ( 28.6% ) | 0                       | ( 0.0% )  |         |
| MMR-D                     | 8                       | ( 19.0% ) | 7                       | ( 46.7% ) |         |
| NSMP                      | 22                      | ( 52.4% ) | 0                       | ( 0.0% )  |         |
| p53abn                    | 0                       | ( 0.0% )  | 8                       | ( 53.3% ) |         |
| Histology                 |                         |           |                         |           | 0.011   |
| Endometrioid              |                         |           |                         |           |         |
| Grade 1                   | 11                      | ( 26.2% ) | 1                       | ( 6.7% )  |         |
| Grade 2                   | 6                       | ( 14.2% ) | 0                       | ( 0.0% )  |         |
| Grade 3                   | 20                      | ( 47.6% ) | 5                       | ( 33.3% ) |         |
| Carcinosarcoma            | 1                       | ( 2.4% )  | 3                       | ( 20.0% ) |         |
| Serous                    | 1                       | ( 2.4% )  | 2                       | ( 13.3% ) |         |
| Clear                     | 2                       | ( 4.8% )  | 3                       | ( 20.0% ) |         |
| Mixed                     | 1                       | ( 2.4% )  | 0                       | ( 0.0% )  |         |
| Others                    | 0                       | ( 0.0% )  | 1                       | ( 6.7% )  |         |
| FIGO (2008) stage         |                         |           |                         |           | 0.113   |
| I&II                      | 24                      | ( 57.1% ) | 5                       | ( 33.3% ) |         |
| III&IV                    | 18                      | ( 42.9% ) | 10                      | ( 66.7% ) |         |
| Recurrence or progression |                         |           |                         |           | 0.143   |
| None                      | 31                      | ( 73.8% ) | 8                       | ( 53.3% ) |         |
| Recurrence                | 10                      | ( 23.8% ) | 7                       | ( 46.7% ) |         |
| Progression               | 1                       | ( 2.4% )  | 0                       | ( 0.0% )  |         |
| Death                     |                         |           |                         |           | 0.358   |
| Negative                  | 33                      | ( 78.6% ) | 10                      | ( 66.7% ) |         |
| Positive                  | 9                       | ( 21.4% ) | 5                       | ( 33.3% ) |         |

NCCH: National Cancer Center Hospital, *TP53* mut: *TP53* mutation, p53wt: p53 wild type, *POLE*-EDM: DNA polymerase epsilon exonuclease domain mutation, MMR-D: Mismatch repair protein deficiency, NSMP: no specific molecular profile, p53abn: p53 abnormal expression, FIGO: International Federation of Gynecology and Obstetrics.

Supplementary Table S3. Hazard ratios for relapse-free survival and overall survival according to prognostic factors in 259 patients with endometrial cancer in NCCH cohort.

| Survival     | Variable                                   | Event/n | Univariate |                |         | Multivariate |                |         |
|--------------|--------------------------------------------|---------|------------|----------------|---------|--------------|----------------|---------|
|              |                                            |         | HR         | ( 95% CI )     | P value | HR           | ( 95% CI )     | P value |
| Relapse free | Age [year] ( ≥65/<65)                      | 20/75   | 1.01       | ( 0.60-1.71 )  | 0.965   |              |                |         |
|              | FIGO (2008) stage (III&IV/I&II )           | 44/97   | 4.19       | ( 2.53-6.96 )  | <0.001  | 3.57*        | ( 2.14-5.97 )  | <0.001  |
|              | Histological grade (high/low) <sup>1</sup> | 44/137  | 1.88       | ( 1.13-3.11 )  | 0.015   | 1.33*        | ( 0.74-2.40 )  | 0.335   |
|              | Molecular subtype                          |         |            |                |         |              |                |         |
|              | <i>POLE</i> -EDM                           | 1/36    |            | Reference      |         |              | Reference      |         |
|              | MMR-D                                      | 16/69   | 10.0       | ( 1.33-75.5 )  | 0.026   | 8.45*        | ( 1.12-63.8 )  | 0.039   |
|              | NSMP                                       | 25/102  | 10.3       | ( 1.39-75.7 )  | 0.023   | 8.85*        | ( 1.19-65.9 )  | 0.033   |
|              | p53abn                                     | 25/52   | 23.6       | ( 3.19-174.1 ) | 0.002   | 16.2*        | ( 2.16-121.0 ) | 0.007   |
|              | Somatic alterations (mut/wt)               |         |            |                |         |              |                |         |
|              | <i>PTEN</i>                                | 25/147  | 0.41       | ( 0.25-0.67 )  | <0.001  | 0.42**       | ( 0.25-0.69 )  | <0.001  |
|              | <i>ARID1A</i>                              | 21/112  | 0.58       | ( 0.35-0.97 )  | 0.038   | 0.58**       | ( 0.35-0.97 )  | 0.040   |
| Overall      | Age [year] ( ≥65/<65)                      | 13/75   | 1.04       | ( 0.54-2.00 )  | 0.898   |              |                |         |
|              | FIGO (2008) stage (III&IV/I&II )           | 32/97   | 5.90       | ( 2.97-11.7 )  | <0.001  | 5.86***      | ( 2.94-11.7 )  | <0.001  |
|              | Histological grade (high/low) <sup>1</sup> | 31/137  | 2.40       | ( 1.23-4.68 )  | 0.010   | 1.90***      | ( 0.97-3.74 )  | 0.062   |
|              | Molecular subtype                          |         |            |                |         |              |                |         |
|              | <i>POLE</i> -EDM                           | 0/36    |            | Reference      |         |              |                |         |
|              | MMR-D                                      | 10/69   | 1.43E+09   | ( - )          | 1.00    |              |                |         |
|              | NSMP                                       | 17/102  | 1.74E+09   | ( - )          | 1.00    |              |                |         |
|              | p53abn                                     | 16/52   | 3.71E+09   | ( - )          | 1.00    |              |                |         |
|              | Somatic alterations (mut/wt)               |         |            |                |         |              |                |         |
|              | <i>PTEN</i>                                | 17/147  | 0.45       | ( 0.24-0.83 )  | 0.011   | 0.47***      | ( 0.25-0.87 )  | 0.017   |
|              | <i>ARID1A</i>                              | 14/112  | 0.63       | ( 0.33-1.19 )  | 0.153   |              |                |         |

\*Adjusted by FIGO stage, histological grade, and molecular subtype. \*\*Adjusted by molecular subtype, FIGO stage, histological grade, and *PTEN* or *ARID1A* mutation.

\*\*\*Adjusted by FIGO stage, histological type, and *PTEN* mutation.

<sup>1</sup> high: endometrioid carcinoma grade3, carcinosarcoma, serous, clear, mixed, and others, low: endometrioid carcinoma grade1 or 2.

NCCH: National Cancer Center Hospital, HR: Hazard ratio, CI: Confidence interval, FIGO: International Federation of Gynecology and Obstetrics, *POLE* -EDM: DNA polymerase epsilon exonuclease domain mutation, MMR-D: Mismatch repair protein deficiency, NSMP: no specific molecular profile, p53abn: p53 abnormal expression, mut: mutant, wt: wild type.



Supplementary Table S4. Hazard ratios for clinical outcomes according to prognostic factors or somatic mutations in patients with NSMP in NCCH cohort.

| Survival     | Variable                                    | Event/n                            | Univariate |                |               | Multivariate* |               |               |       |
|--------------|---------------------------------------------|------------------------------------|------------|----------------|---------------|---------------|---------------|---------------|-------|
|              |                                             |                                    | HR         | ( 95% CI )     | P value       | HR            | ( 95% CI )    | P value       |       |
| Relapse free | Age [year] ( ≥65/<65)                       | 7/25                               | 1.34       | ( 0.56-3.24 )  | 0.514         |               |               |               |       |
|              | FIGO (2008) stage (III&IV/I&II )            | 17/40                              | 4.22       | ( 1.81-9.81 )  | <0.001        | 3.35          | ( 1.40-8.00 ) | 0.007         |       |
|              | Histological grade (high/low) <sup>1</sup>  | 13/31                              | 2.95       | ( 1.34-6.51 )  | 0.007         | 1.78          | ( 0.78-4.09 ) | 0.174         |       |
|              | Genes detected in somatic mutation (mut/wt) |                                    |            |                |               |               |               |               |       |
|              | <i>KRAS + ARID1A</i>                        |                                    |            |                |               |               |               |               |       |
|              |                                             | <i>KRAS</i> wt + <i>ARID1A</i> mut | 2/27       |                | Reference     |               |               | Reference     |       |
|              |                                             | <i>KRAS</i> wt + <i>ARID1A</i> wt  | 11/47      | 3.32           | ( 0.73-15.0 ) | 0.119         | 2.53          | ( 0.56-11.5 ) | 0.231 |
|              | <i>KRAS</i> mut + <i>ARID1A</i> mut         | 2/11                               | 2.81       | ( 0.39-20.0 )  | 0.303         | 1.52          | ( 0.21-11.2 ) | 0.681         |       |
|              | <i>KRAS</i> mut + <i>ARID1A</i> wt          | 10/17                              | 11.0       | ( 2.39-50.3 )  | 0.002         | 6.98          | ( 1.47-33.2 ) | 0.015         |       |
| Overall      | Age [year] ( ≥65/<65)                       | 5/25                               | 1.53       | ( 0.53-4.41 )  | 0.435         |               |               |               |       |
|              | FIGO (2008) stage (III&IV/I&II )            | 14/40                              | 8.28       | ( 2.37-28.9 )  | <0.001        | 5.54          | ( 1.54-20.0 ) | 0.009         |       |
|              | Histological grade (high/low) <sup>1</sup>  | 12/31                              | 5.89       | ( 2.07-16.8 )  | <0.001        | 3.49          | ( 1.18-10.3 ) | 0.024         |       |
|              | Genes detected in somatic mutation (mut/wt) |                                    |            |                |               |               |               |               |       |
|              | <i>KRAS + ARID1A</i>                        |                                    |            |                |               |               |               |               |       |
|              |                                             | <i>KRAS</i> wt + <i>ARID1A</i> mut | 1/27       |                | Reference     |               |               | Reference     |       |
|              |                                             | <i>KRAS</i> wt + <i>ARID1A</i> wt  | 6/47       | 3.21           | ( 0.38-26.9 ) | 0.283         | 1.99          | ( 0.24-16.9 ) | 0.526 |
|              | <i>KRAS</i> mut + <i>ARID1A</i> mut         | 2/11                               | 5.41       | ( 0.49-60.0 )  | 0.169         | 1.75          | ( 0.15-20.8 ) | 0.659         |       |
|              | <i>KRAS</i> mut + <i>ARID1A</i> wt          | 8/17                               | 14.9       | ( 1.86-120.0 ) | 0.011         | 5.99          | ( 0.71-50.7 ) | 0.100         |       |

\*Adjusted by age, FIGO stage, and histological type.

<sup>1</sup> high: endometrioid carcinoma grade3, carcinosarcoma, serous, clear, mixed, and others, low: endometrioid carcinoma grade1 or 2.

NSMP: no specific molecular profile, NCCH: National Cancer Center Hospital, HR: Hazard ratio, CI: Confidence interval, FIGO: International Federation of Gynecology and Obstetrics, mut: mutant, wt: wild type.

Supplementary Table S5. Clinicopathological characteristics of 17 cases with *KRAS* mutated and *ARID1A* wild type in NCCH cohort.

| Patients | Age | Histology | FIGO  | Recurrence status | Metastatic lesions           | Outcome | Adjuvant therapy |
|----------|-----|-----------|-------|-------------------|------------------------------|---------|------------------|
| 1        | 46  | EEC G2    | IVB   | Recurrence        | Distant (lung)               | DOD     | TAP              |
| 2        | 49  | EEC G3    | IIIA  | Recurrence        | Distant (bone)               | DOD     | AP               |
| 3        | 37  | CS        | IIIC1 | Recurrence        | Distant (lung)               | DOD     | IFM+PTX          |
| 4        | 46  | CS        | IIIC2 | Recurrence        | Distant (cancerous pleurisy) | DOD     | IFM+PTX          |
| 5        | 48  | CS        | IA    | Recurrence        | Distant (lung)               | DOD     | IFM+PTX          |
| 6        | 63  | Serous    | IIIC1 | Recurrence        | Distant (PALN→brain)         | DOD     | AP               |
| 7        | 61  | EEC G2    | IIIC1 | Recurrence        | Local (vagina)               | DOD     | DP               |
| 8        | 62  | EEC G2    | IIIC1 | Recurrence        | Local (vagina)               | DOC     | AP               |
| 9        | 49  | EEC G1    | II    | Recurrence        | Distant (lung)               | AWD     | AP               |
| 10       | 77  | EEC G1    | IB    | Recurrence        | Local (vagina)               | AWD     | None             |
| 11       | 65  | EEC G1    | IB    | No                | -                            | NED     | None             |
| 12       | 53  | EEC G1    | IA    | No                | -                            | NED     | None             |
| 13       | 53  | EEC G1    | IA    | No                | -                            | NED     | None             |
| 14       | 47  | EEC G1    | IA    | No                | -                            | NED     | None             |
| 15       | 60  | EEC G3    | IB    | No                | -                            | NED     | None             |
| 16       | 47  | EEC G3    | IIIC1 | No                | -                            | NED     | AP               |
| 17       | 51  | Others    | IA    | No                | -                            | NED     | None             |

NCCH: National Cancer Center Hospital, FIGO: International Federation of Gynecology and Obstetrics, EEC G: endometrioid endometrial carcinoma grade, CS: carcinosarcoma, PALN: para-aortic lymph nodes, DOD: died of disease, AWD: alive with disease, NED: no evidence of disease, TAP: paclitaxel, adriamycin, and cisplatin, AP: adriamycin and cisplatin, IFM+PTX: ifosfamide and paclitaxel, DP: docetaxel and cisplatin.

Supplementary Table S6. Patient characteristics according to molecular subtypes in C-CAT cohort.

| Characteristics                              | All     |           | POLE-EDM |            | MSI-H  |           | NSMP    |           | TP53 mutation |           | P value  |
|----------------------------------------------|---------|-----------|----------|------------|--------|-----------|---------|-----------|---------------|-----------|----------|
|                                              | [n=764] | ( % )     | [n=16]   | ( 2.1% )   | [n=87] | ( 11.4% ) | [n=267] | ( 34.9% ) | [n=394]       | ( 51.6% ) |          |
| Clinicopathological parameters               |         |           |          |            |        |           |         |           |               |           |          |
| Age (median,range)                           | 63      | ( 25-85 ) | 58       | ( 38-78 )  | 55     | ( 35-78 ) | 61      | ( 25-82 ) | 65            | ( 30-85 ) | <0.001*  |
| Histological types                           |         |           |          |            |        |           |         |           |               |           |          |
| Endometrioid                                 |         |           |          |            |        |           |         |           |               |           |          |
| Unknown grade                                | 255     | ( 33.4% ) | 3        | ( 18.75% ) | 45     | ( 51.7% ) | 128     | ( 48.0% ) | 79            | ( 20.0% ) |          |
| Grade 1                                      | 27      | ( 3.5% )  | 0        | ( 0.0% )   | 2      | ( 2.3% )  | 19      | ( 7.1% )  | 6             | ( 1.5% )  |          |
| Grade 2                                      | 31      | ( 4.1% )  | 1        | ( 6.25% )  | 1      | ( 1.2% )  | 18      | ( 6.7% )  | 11            | ( 2.8% )  |          |
| Grade 3                                      | 43      | ( 5.6% )  | 4        | ( 25.0% )  | 7      | ( 8.0% )  | 16      | ( 6.0% )  | 16            | ( 4.0% )  |          |
| Serous                                       | 132     | ( 17.3% ) | 1        | ( 6.25% )  | 2      | ( 2.3% )  | 8       | ( 3.0% )  | 121           | ( 30.7% ) |          |
| Carcinosarcoma                               | 130     | ( 17.0% ) | 1        | ( 6.25% )  | 6      | ( 6.9% )  | 29      | ( 10.9% ) | 94            | ( 23.9% ) |          |
| Mixed                                        | 26      | ( 3.4% )  | 0        | ( 0.0% )   | 6      | ( 6.9% )  | 3       | ( 1.1% )  | 17            | ( 4.3% )  |          |
| Clear                                        | 25      | ( 3.3% )  | 1        | ( 6.25% )  | 0      | ( 0.0% )  | 13      | ( 4.9% )  | 11            | ( 2.8% )  |          |
| Un/De-differentiated                         | 18      | ( 2.4% )  | 1        | ( 6.25% )  | 6      | ( 6.9% )  | 8       | ( 3.0% )  | 3             | ( 0.8% )  |          |
| Neuroendocrine                               | 7       | ( 0.9% )  | 0        | ( 0.0% )   | 1      | ( 1.2% )  | 2       | ( 0.7% )  | 4             | ( 1.0% )  |          |
| Poorly differentiated carcinoma <sup>1</sup> | 14      | ( 1.8% )  | 1        | ( 6.25% )  | 3      | ( 3.4% )  | 1       | ( 0.4% )  | 9             | ( 2.3% )  |          |
| Carcinoma                                    | 46      | ( 6.0% )  | 2        | ( 12.5% )  | 6      | ( 6.9% )  | 18      | ( 6.7% )  | 20            | ( 5.1% )  |          |
| Others carcinoma                             | 10      | ( 1.3% )  | 1        | ( 6.25% )  | 2      | ( 2.3% )  | 4       | ( 1.5% )  | 3             | ( 0.8% )  |          |
| Histological grade                           |         |           |          |            |        |           |         |           |               |           | <0.001** |
| Low                                          | 58      | ( 7.6% )  | 1        | ( 6.3% )   | 3      | ( 3.5% )  | 37      | ( 13.8% ) | 17            | ( 4.3% )  |          |
| High                                         | 405     | ( 53.0% ) | 10       | ( 62.5% )  | 33     | ( 37.9% ) | 84      | ( 31.5% ) | 278           | ( 70.6% ) |          |
| Unclassifiable                               | 301     | ( 39.4% ) | 5        | ( 31.2% )  | 51     | ( 58.6% ) | 146     | ( 54.7% ) | 99            | ( 25.1% ) |          |
| Outcome                                      |         |           |          |            |        |           |         |           |               |           | 0.598*** |
| Alive                                        | 630     | ( 82.5% ) | 13       | ( 81.2% )  | 71     | ( 81.6% ) | 227     | ( 85.0% ) | 319           | ( 81.0% ) |          |
| Death                                        | 134     | ( 17.5% ) | 3        | ( 18.8% )  | 16     | ( 18.4% ) | 40      | ( 15.0% ) | 75            | ( 19.0% ) |          |
| Follow-up period [month] (median, range)     | 27      | ( 1-270 ) | 19       | ( 9-94 )   | 23     | ( 1-99 )  | 33      | ( 1-270 ) | 25            | ( 2-198 ) | 0.017*   |

\* Mann-Whitney's U test. \*\* Low grade vs high grade, Chi-squared test. \*\*\* Chi-squared test.

<sup>1</sup> Poorly differentiated adenocarcinoma cases that did not clearly meet the 2020 WHO classification criteria were described as "poorly differentiated carcinoma".

C-CAT: the Center for Cancer Genomics and Advanced Therapeutics, POLE-EDM: DNA polymerase epsilon exonuclease domain mutation, MSI-H: Microsatellite instability high, NSMP: no specific molecular profile.

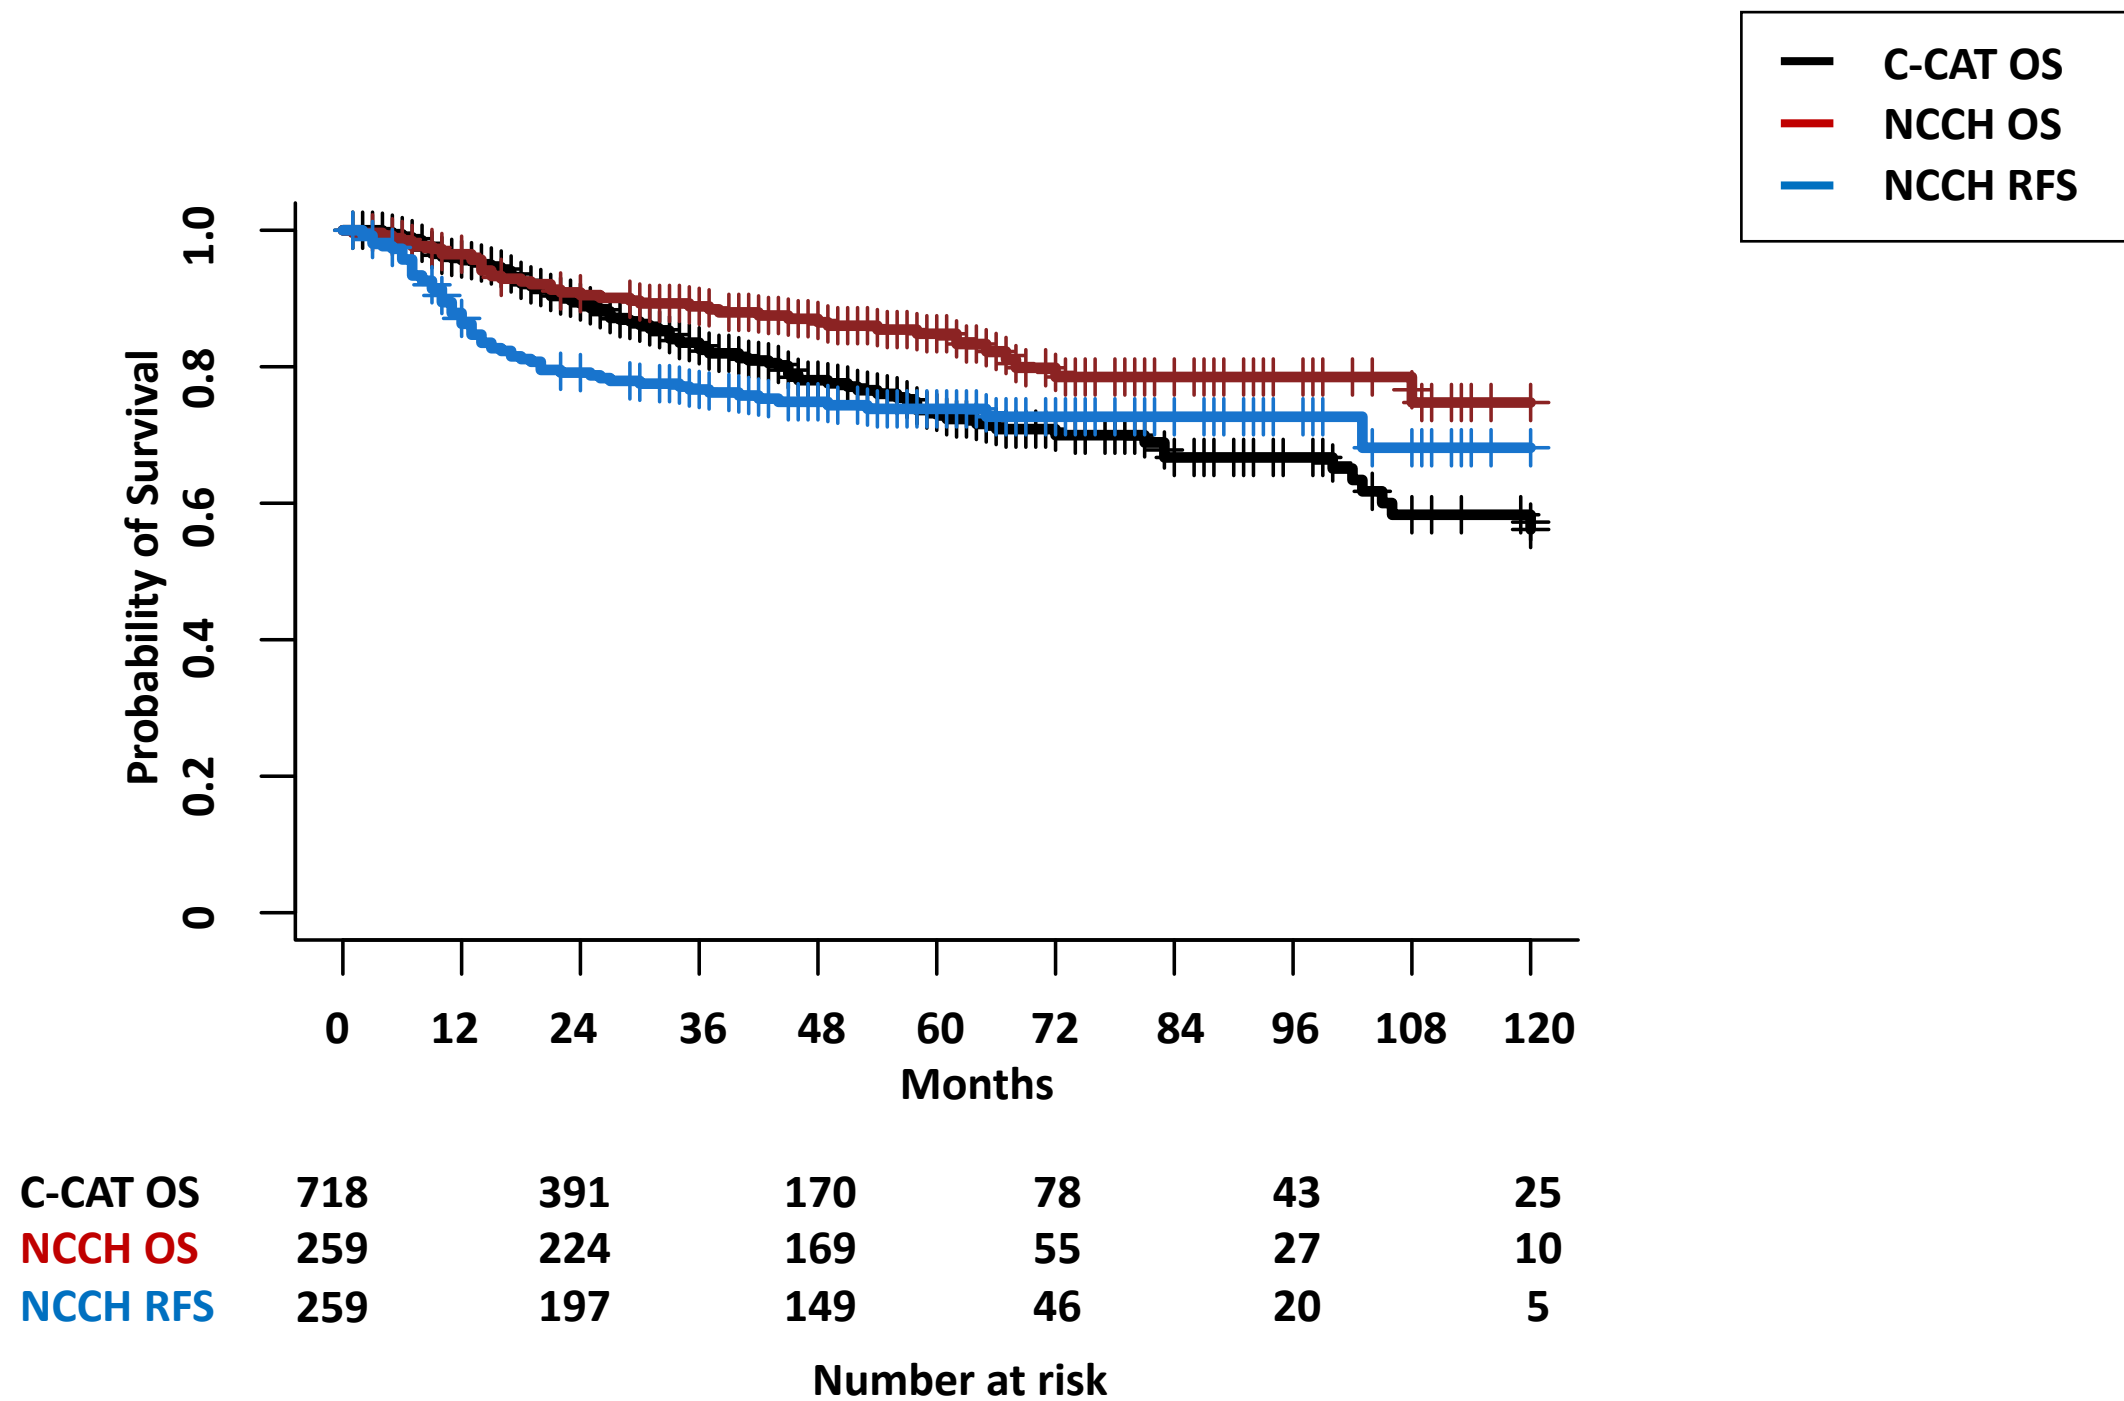

Supplementary Figure S1. Kaplan–Meier survival curve for entire cohort.

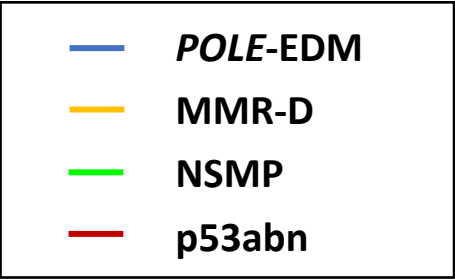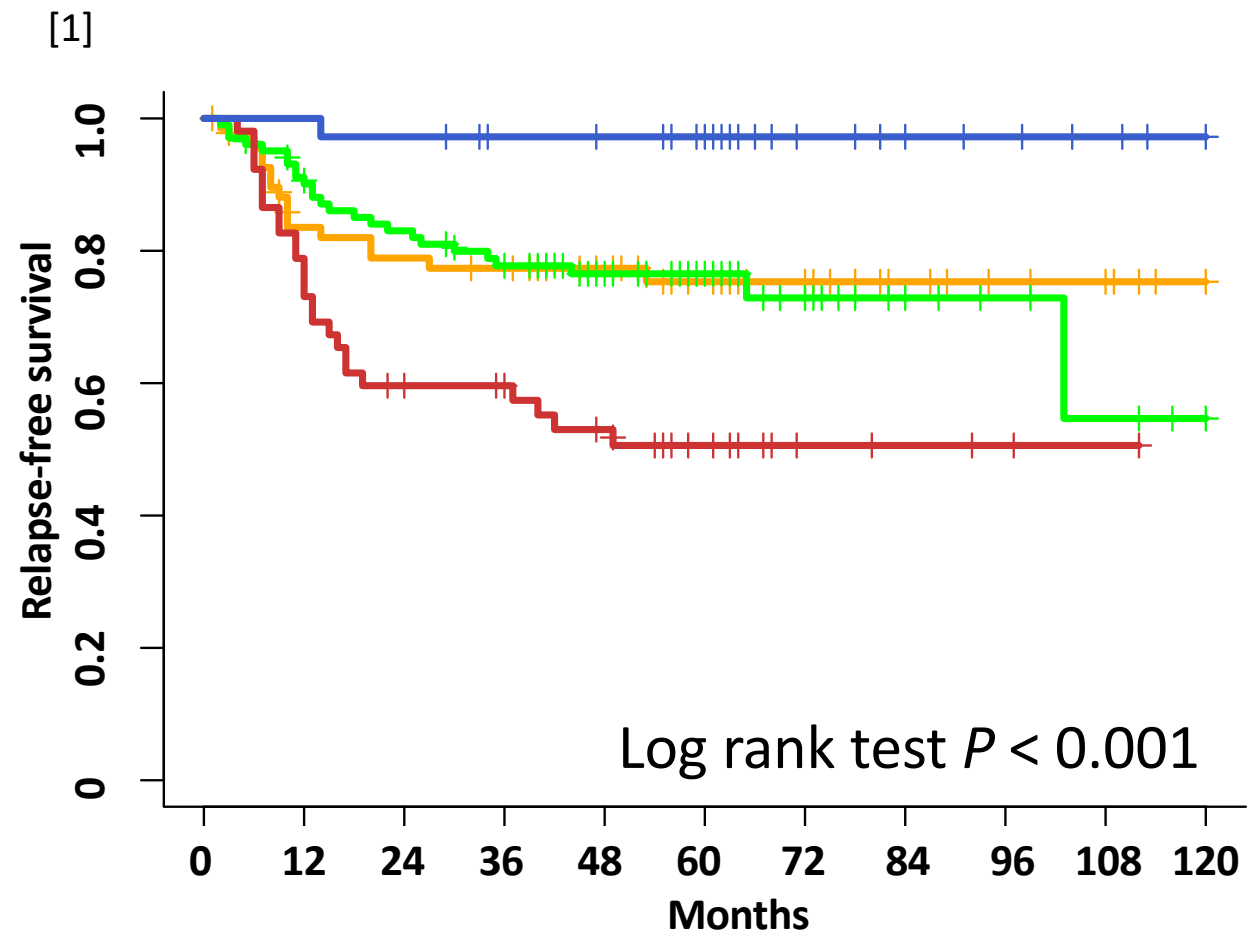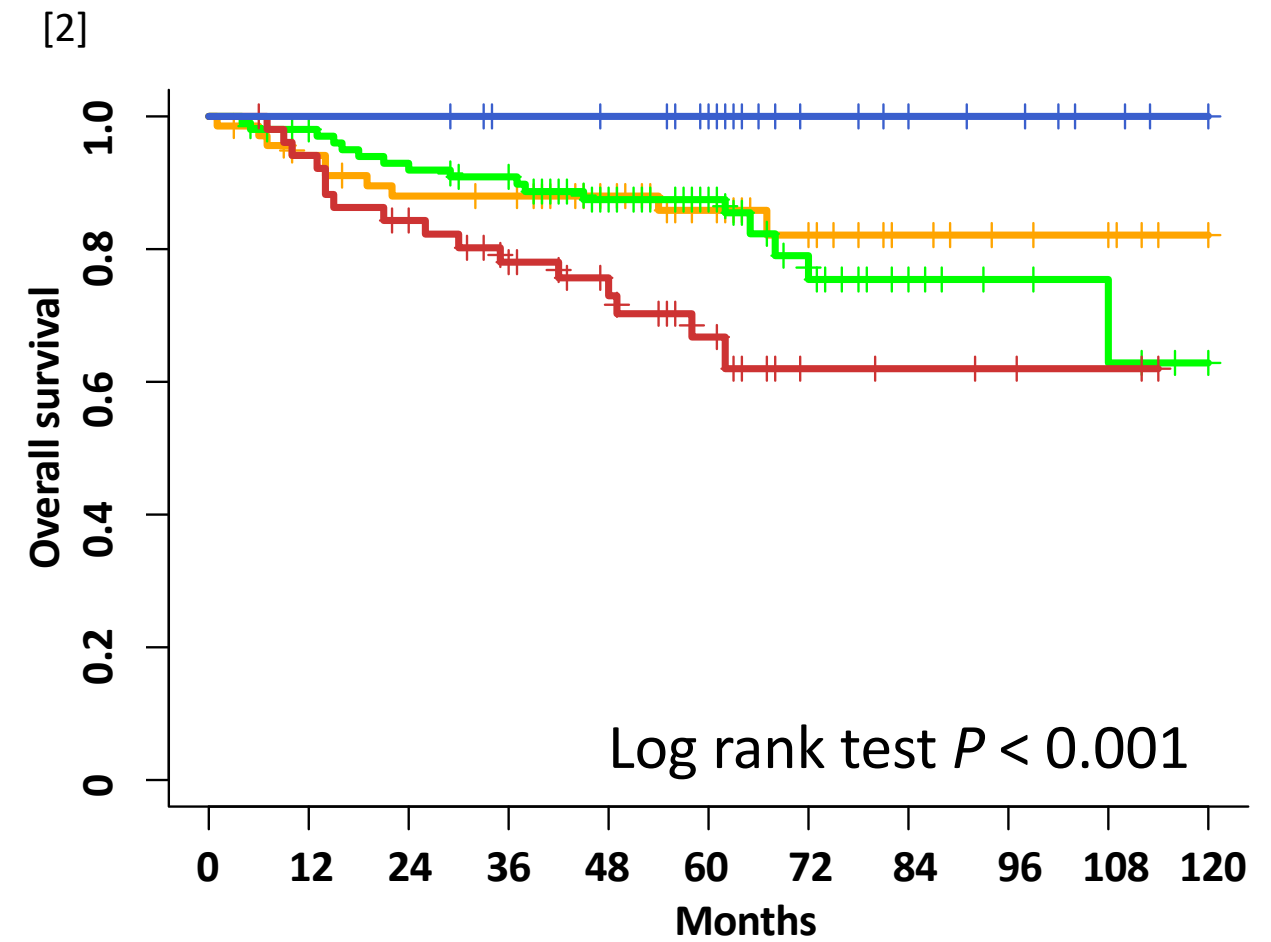

|                 |     |    |    |    |   |   |
|-----------------|-----|----|----|----|---|---|
| <i>POLE-EDM</i> | 36  | 35 | 29 | 10 | 6 | 1 |
| <i>MMR-D</i>    | 69  | 51 | 42 | 19 | 8 | 3 |
| <i>NSMP</i>     | 102 | 82 | 58 | 17 | 5 | 1 |
| <i>p53abn</i>   | 52  | 30 | 22 | 4  | 2 | 0 |

Number at risk

|                 |     |    |    |    |    |   |
|-----------------|-----|----|----|----|----|---|
| <i>POLE-EDM</i> | 36  | 36 | 30 | 10 | 6  | 1 |
| <i>MMR-D</i>    | 69  | 57 | 48 | 22 | 11 | 6 |
| <i>NSMP</i>     | 102 | 91 | 66 | 22 | 7  | 3 |
| <i>p53abn</i>   | 52  | 42 | 28 | 5  | 3  | 0 |

Number at risk

**Supplementary Figure S2. Kaplan–Meier survival curves according to molecular subtype at all stages in the NCCH cohort.**

[1] RFS and [2] OS.

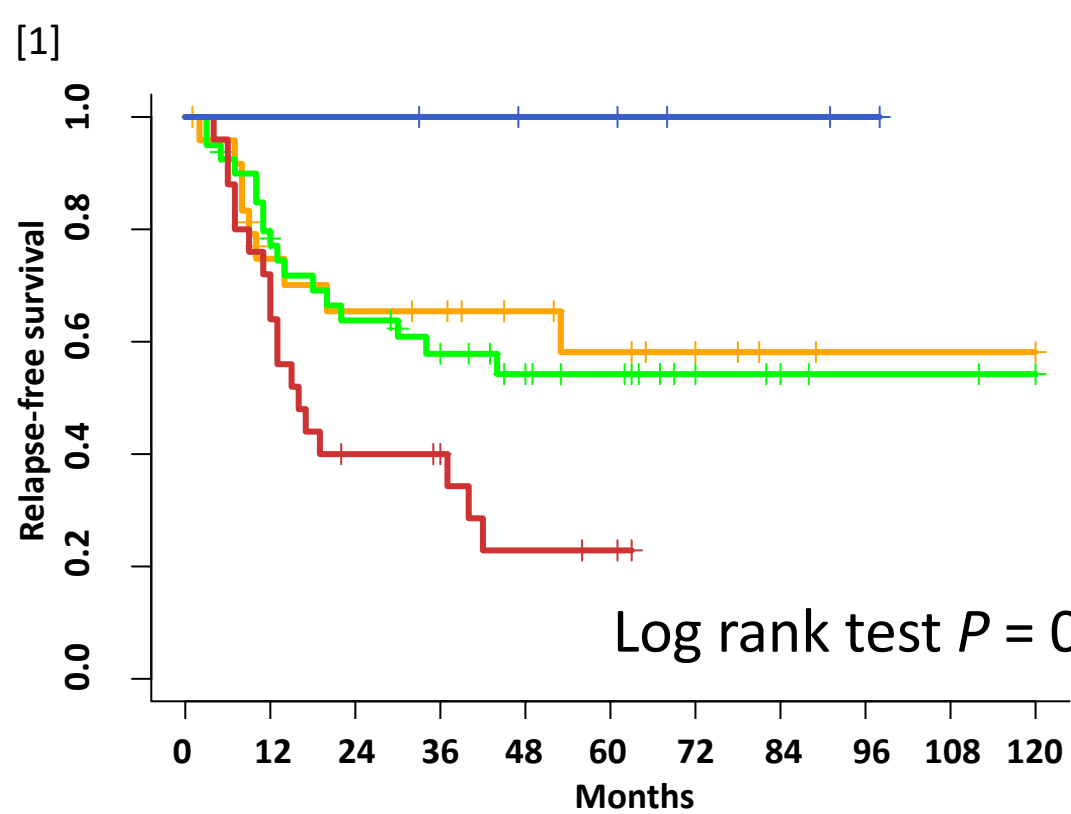

|                 |    |    |    |   |   |   |
|-----------------|----|----|----|---|---|---|
| <i>POLE-EDM</i> | 7  | 7  | 5  | 2 | 1 | 0 |
| <i>MMR-D</i>    | 25 | 14 | 10 | 6 | 2 | 2 |
| <i>NSMP</i>     | 40 | 24 | 14 | 6 | 2 | 1 |
| <i>p53abn</i>   | 25 | 9  | 4  | 0 | 0 | 0 |

Number at risk

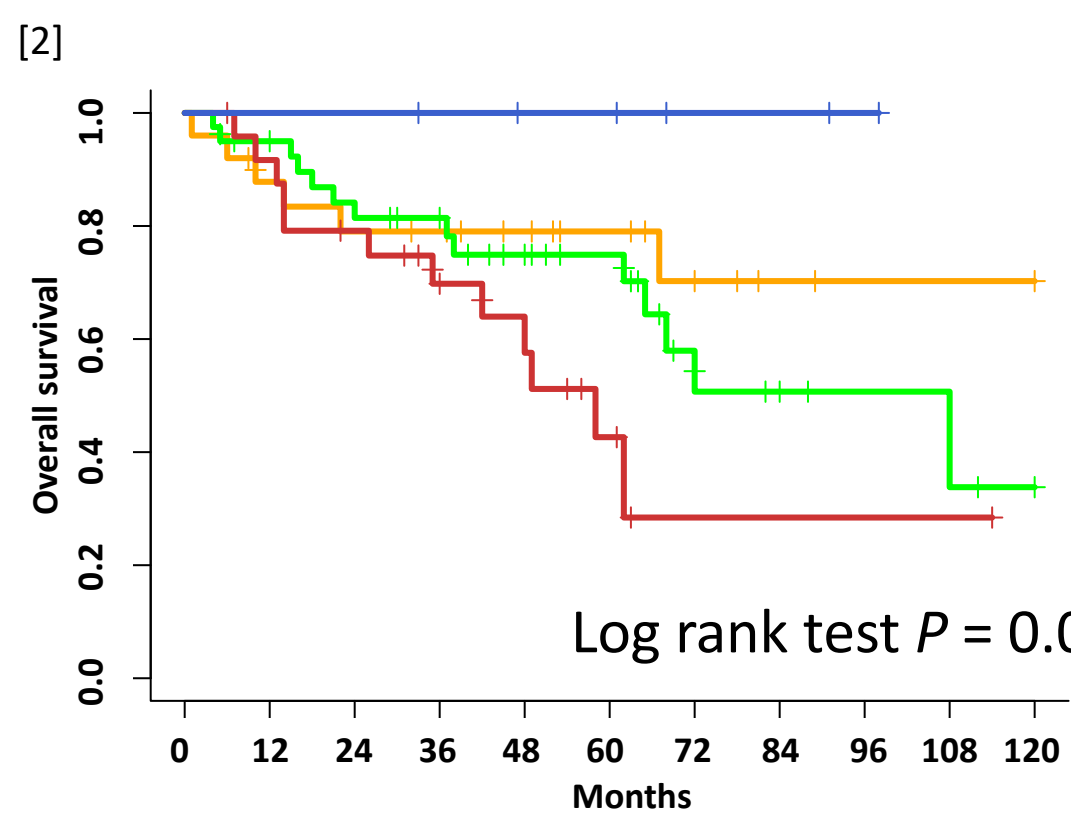

|                 |    |    |    |   |   |   |
|-----------------|----|----|----|---|---|---|
| <i>POLE-EDM</i> | 7  | 7  | 5  | 2 | 1 | 0 |
| <i>MMR-D</i>    | 25 | 18 | 14 | 8 | 4 | 4 |
| <i>NSMP</i>     | 40 | 31 | 20 | 8 | 3 | 1 |
| <i>p53abn</i>   | 25 | 18 | 10 | 1 | 1 | 0 |

Number at risk

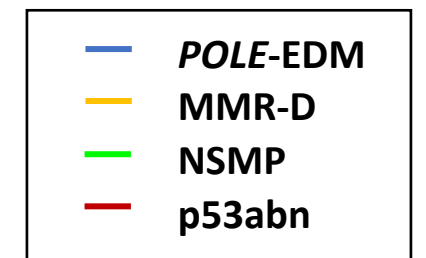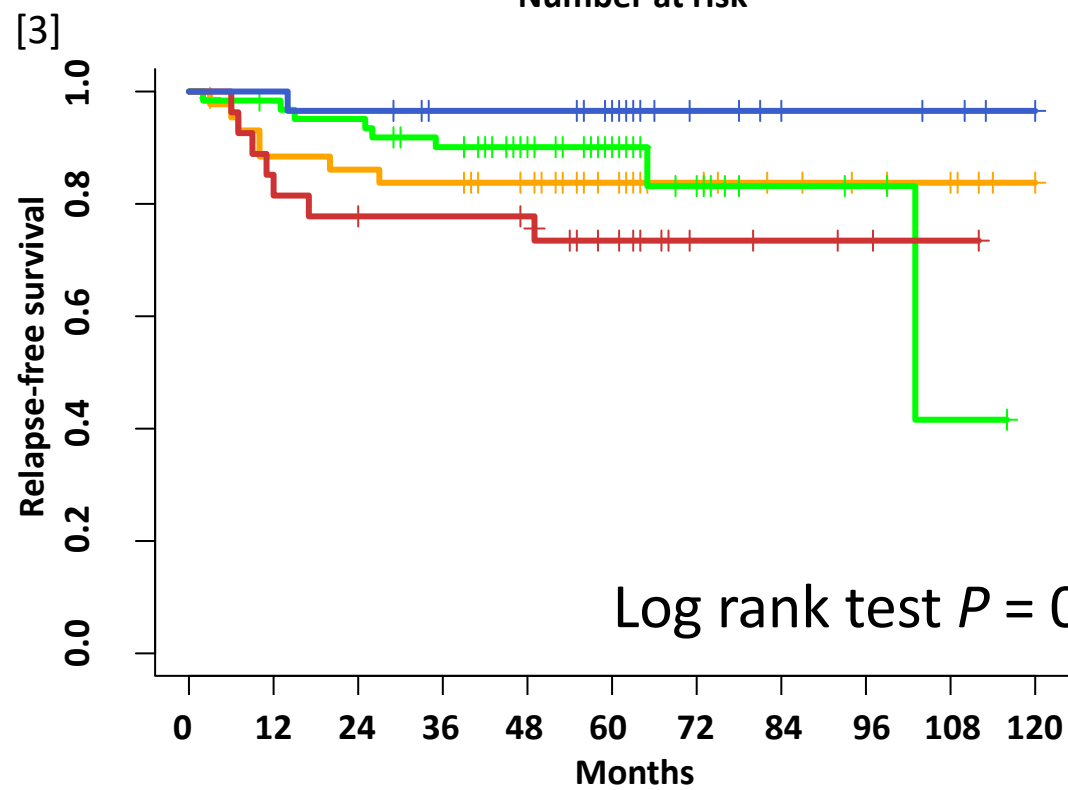

|                 |    |    |    |    |   |   |
|-----------------|----|----|----|----|---|---|
| <i>POLE-EDM</i> | 29 | 28 | 24 | 7  | 4 | 1 |
| <i>MMR-D</i>    | 44 | 37 | 32 | 13 | 6 | 1 |
| <i>NSMP</i>     | 62 | 57 | 44 | 11 | 3 | 0 |
| <i>p53abn</i>   | 27 | 21 | 18 | 4  | 2 | 0 |

Number at risk

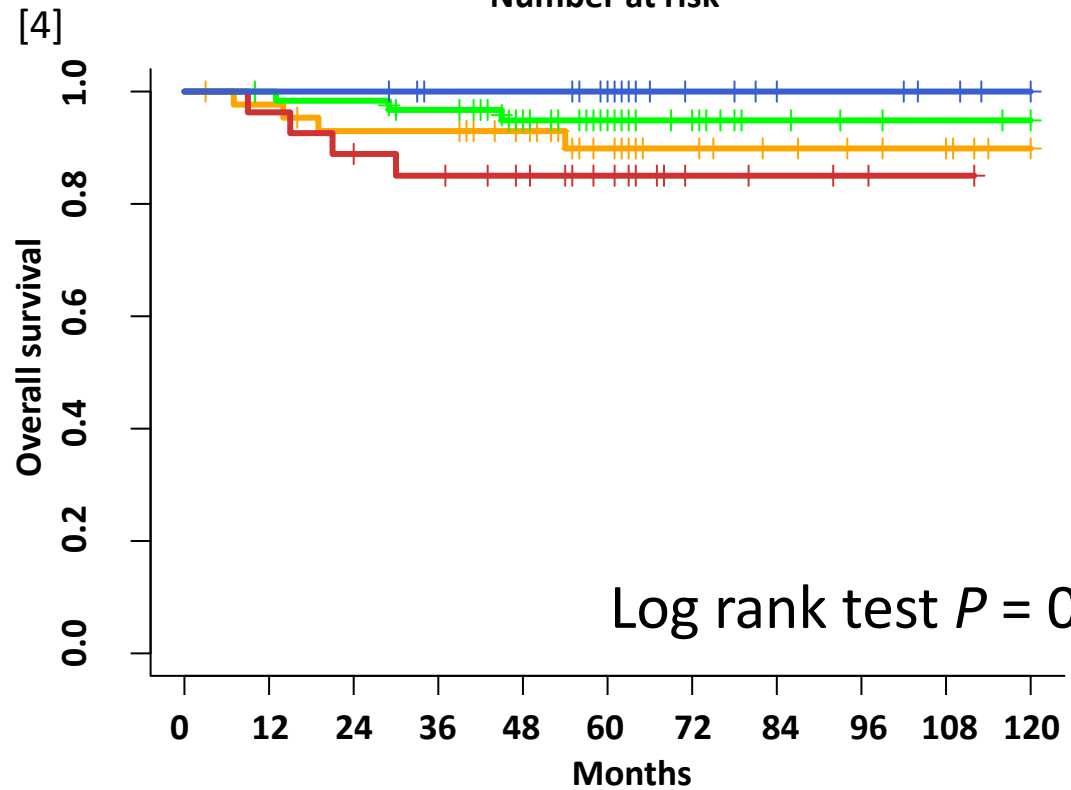

|                 |    |    |    |    |   |   |
|-----------------|----|----|----|----|---|---|
| <i>POLE-EDM</i> | 29 | 29 | 25 | 8  | 5 | 1 |
| <i>MMR-D</i>    | 44 | 39 | 34 | 14 | 7 | 2 |
| <i>NSMP</i>     | 62 | 60 | 45 | 14 | 4 | 2 |
| <i>p53abn</i>   | 27 | 24 | 18 | 4  | 2 | 0 |

Number at risk

**Supplementary Figure S3. Kaplan–Meier survival curves according to molecular subtype by FIGO stages in the NCCH cohort.**

[1] RFS in advanced stages (FIGO III–IV). [2] OS in advanced stages. [3] RFS in early stages (FIGO I–II). [4] OS in early stages.

[1]

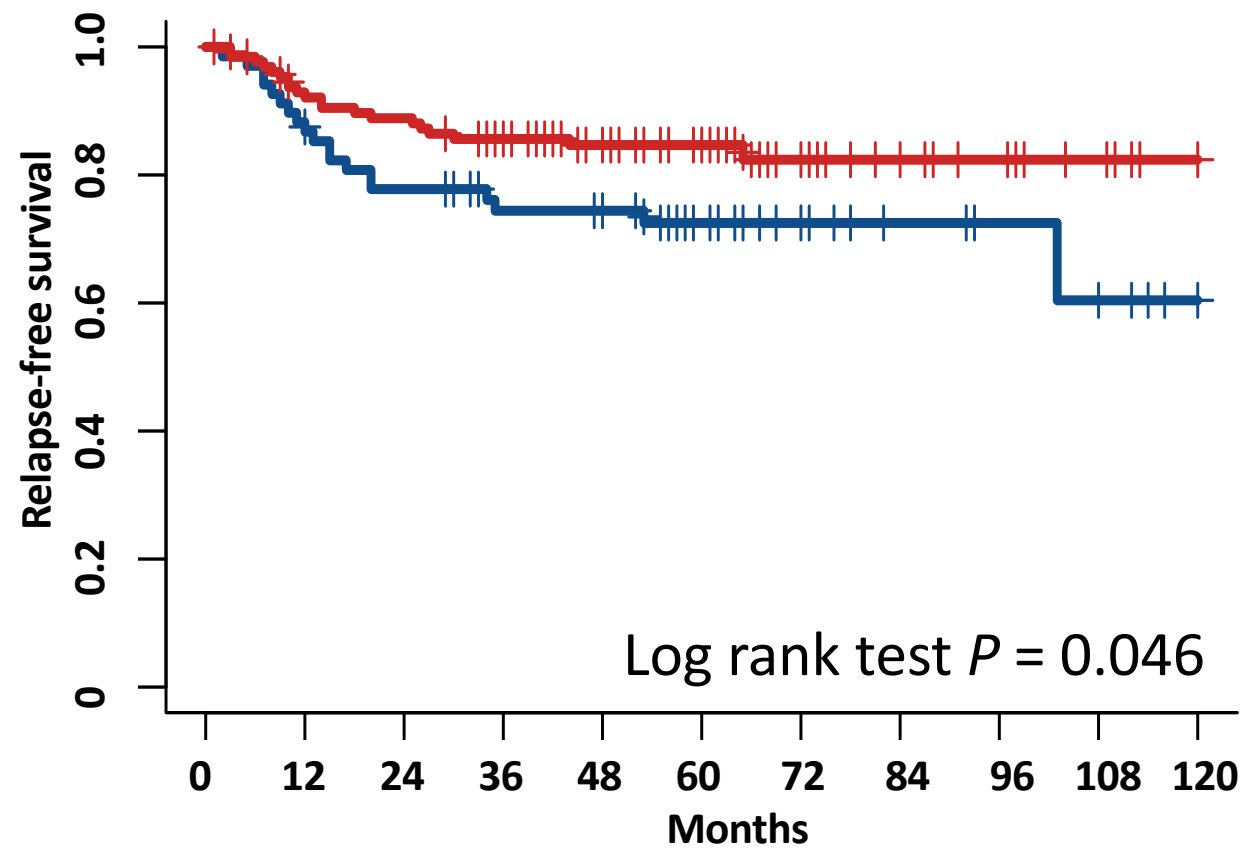

|                            |                |     |    |    |    |   |
|----------------------------|----------------|-----|----|----|----|---|
| <i>PTEN</i> <sup>mut</sup> | 130            | 110 | 85 | 28 | 13 | 4 |
| <i>PTEN</i> <sup>wt</sup>  | 68             | 52  | 40 | 14 | 6  | 1 |
|                            | Number at risk |     |    |    |    |   |

[2]

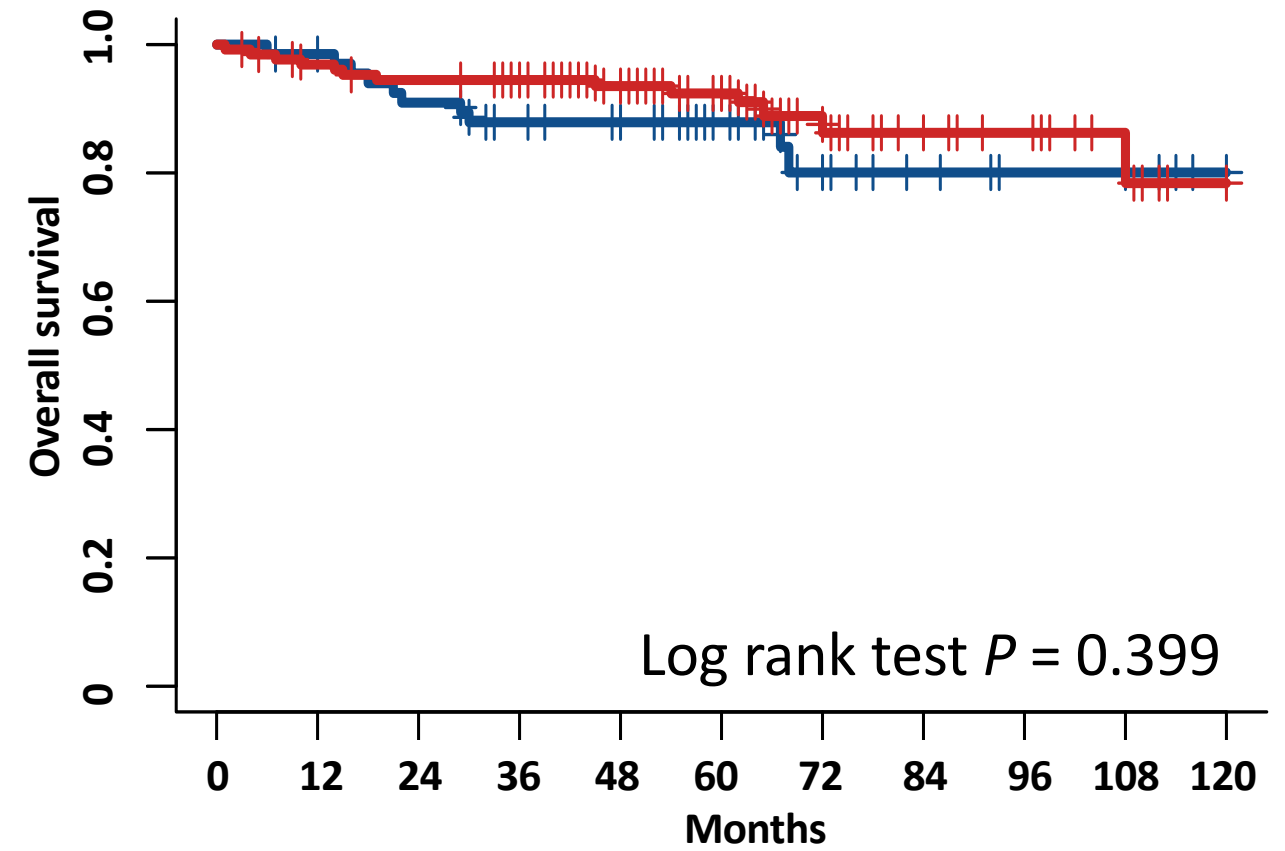

|                            |                |     |    |    |    |   |
|----------------------------|----------------|-----|----|----|----|---|
| <i>PTEN</i> <sup>mut</sup> | 130            | 117 | 94 | 32 | 16 | 5 |
| <i>PTEN</i> <sup>wt</sup>  | 68             | 60  | 46 | 18 | 9  | 5 |
|                            | Number at risk |     |    |    |    |   |

**Supplementary Figure S4. Kaplan–Meier survival curves according to *PTEN* mutation status in endometrioid endometrial carcinoma patients in the NCCH cohort.**

[1] RFS and [2] OS.

**A**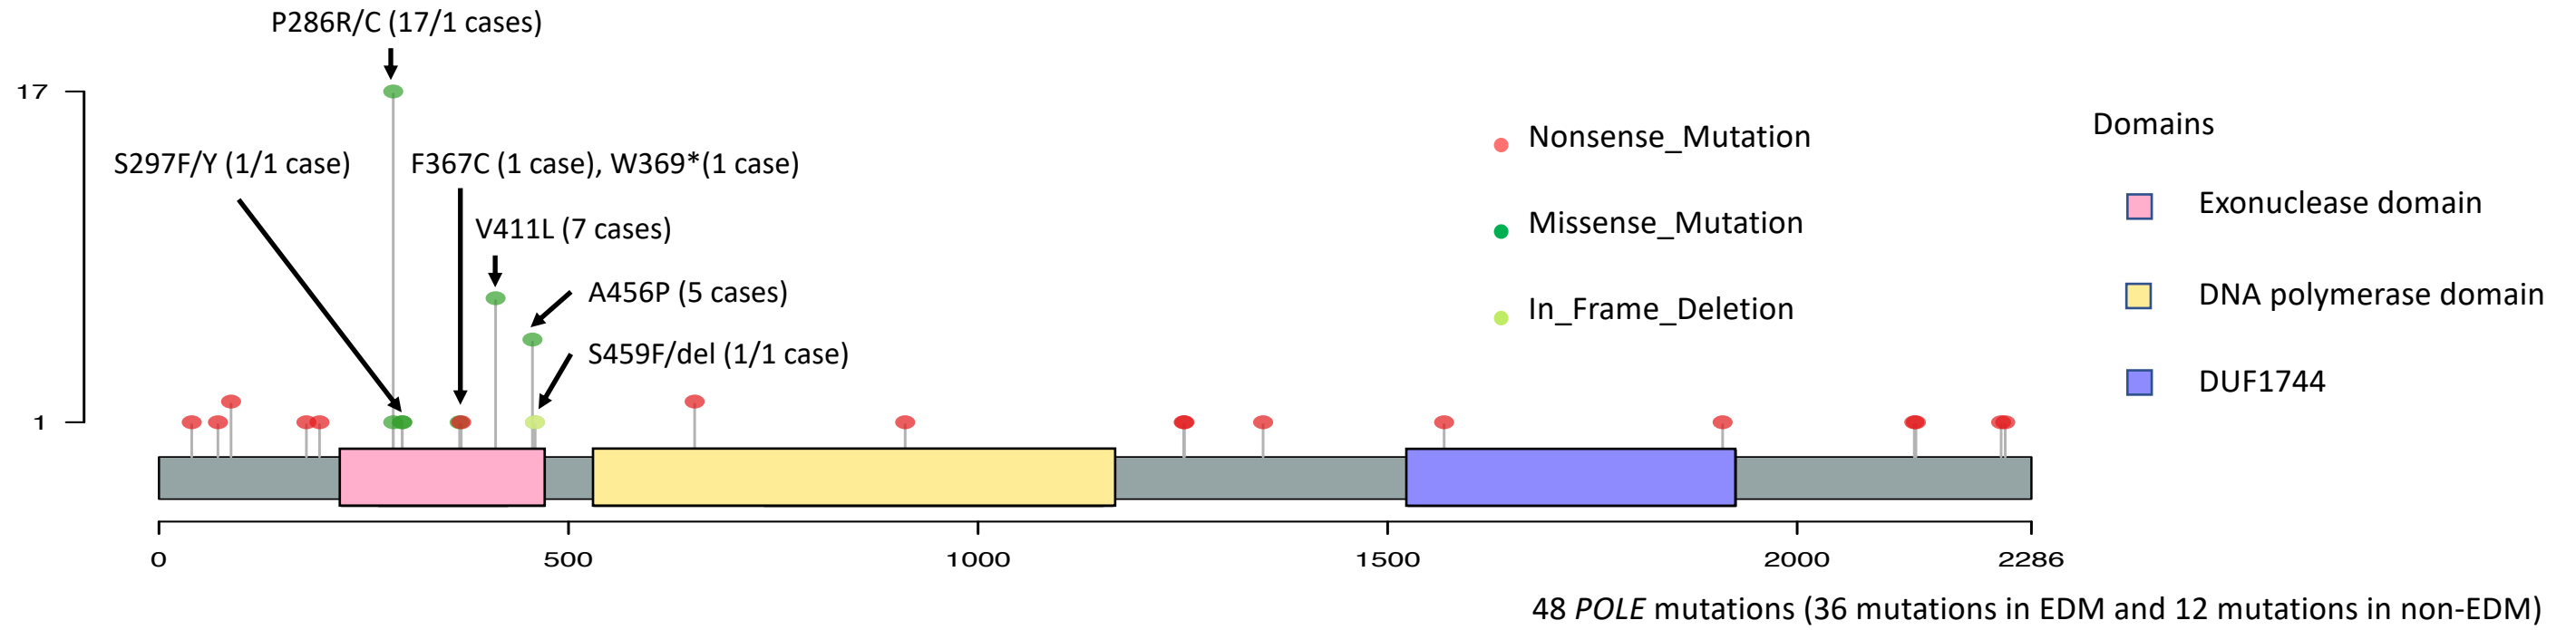**B**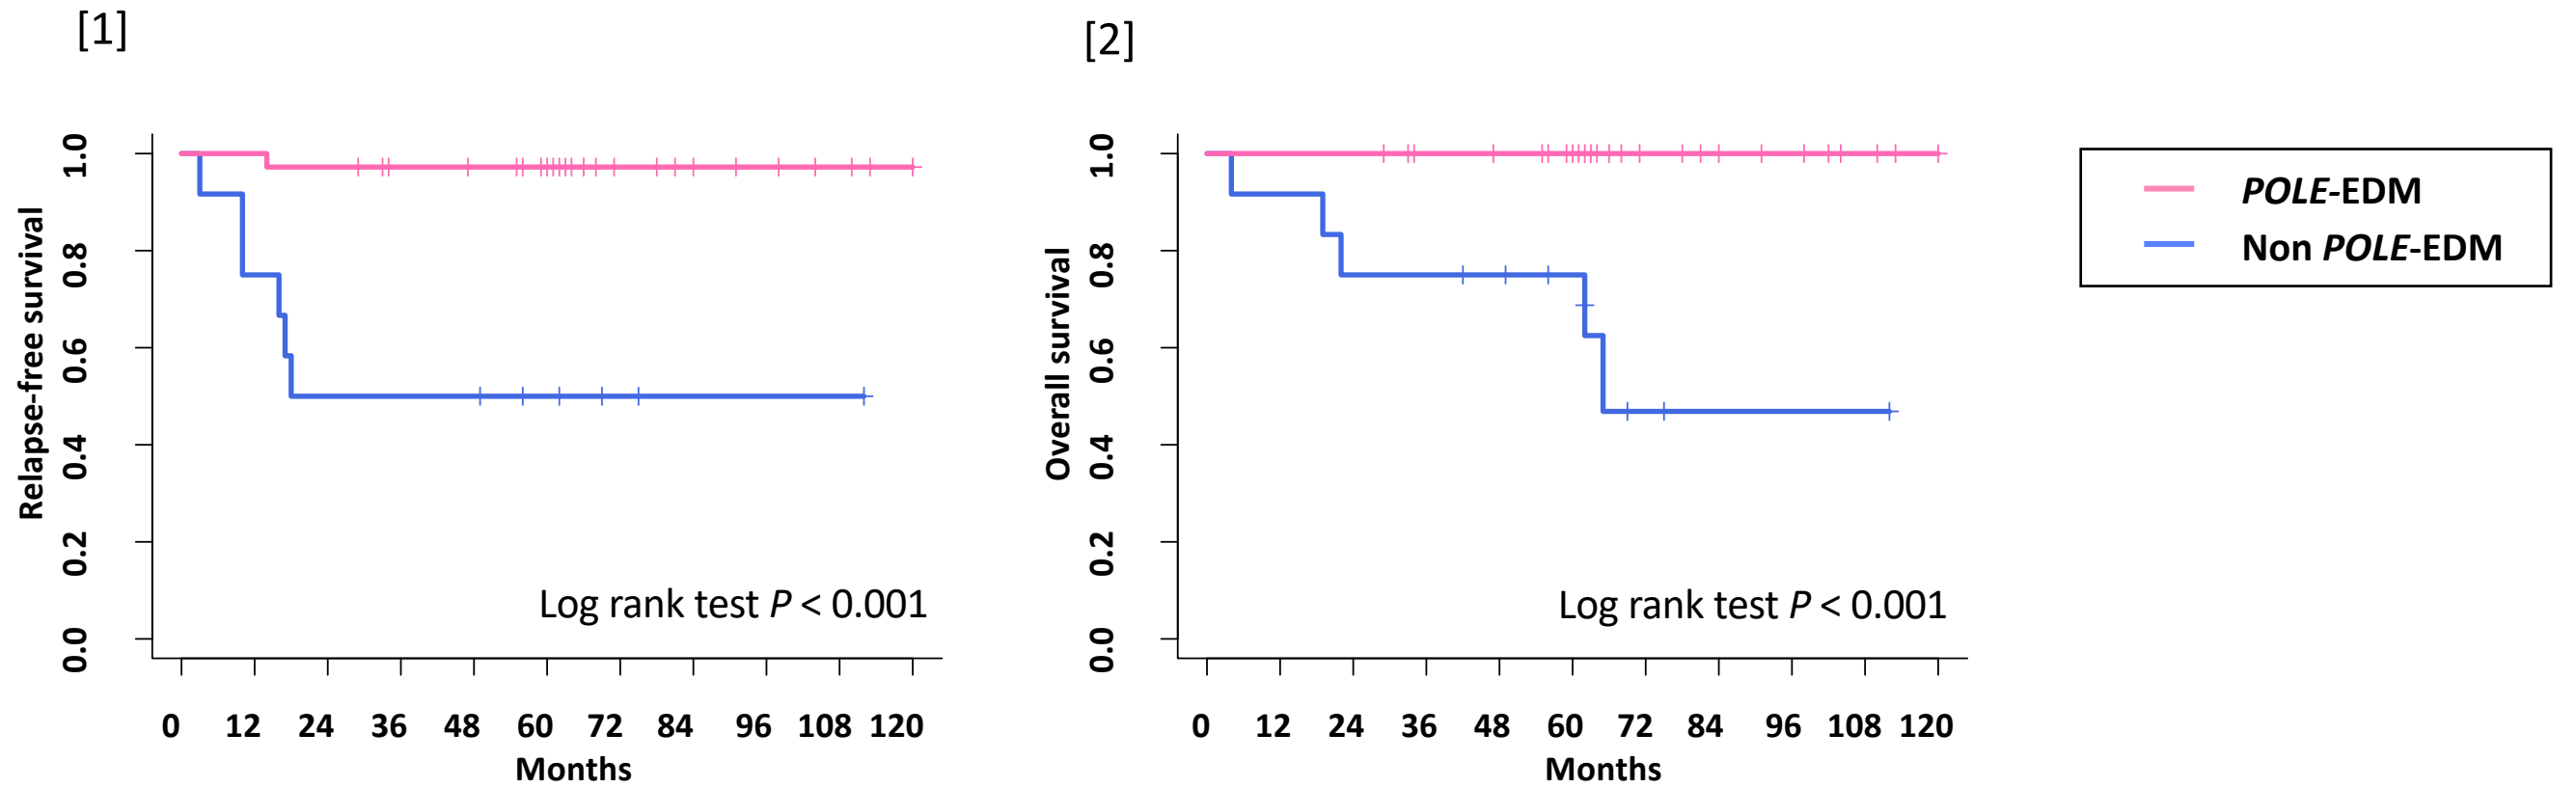

**Supplementary Figure S5. *POLE* variants and patient outcomes in the NCCH cohort.**

**A.** Lollipop plot illustrating all *POLE* variants. **B.** Kaplan–Meier survival curves according to *POLE* mutation status. Indicates [1] RFS and [2] OS.



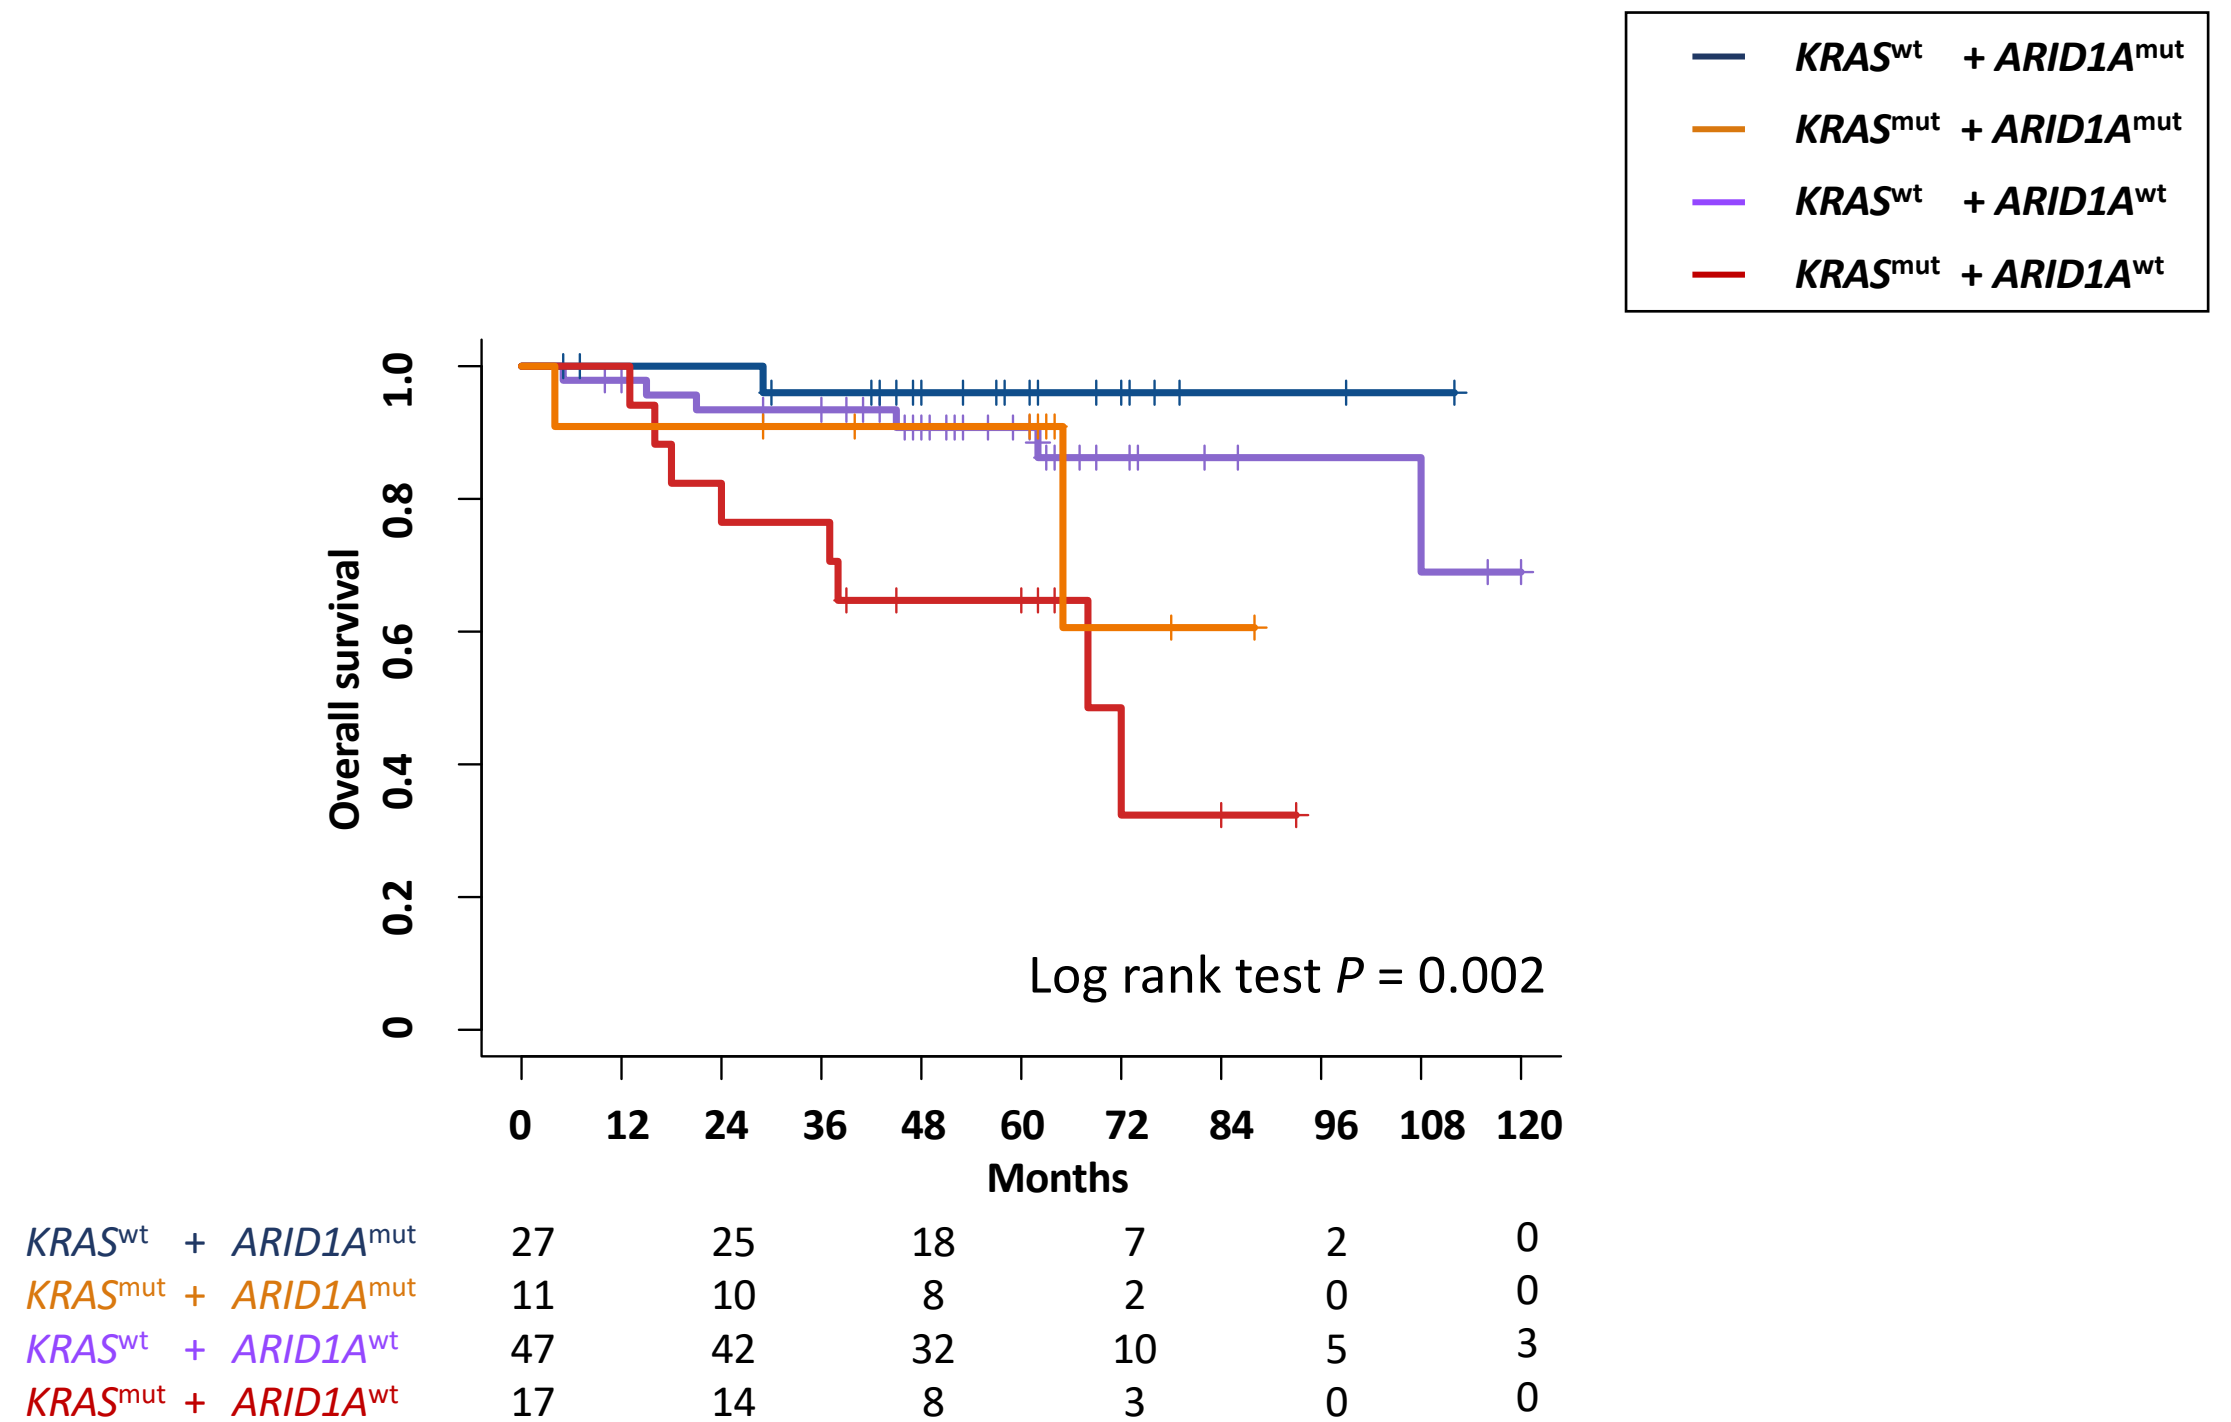

Supplementary Figure S6. Kaplan–Meier survival curve according to *KRAS* and *ARID1A* status in endometrial cancer patients with no specific molecular profile in the NCCH cohort.

A

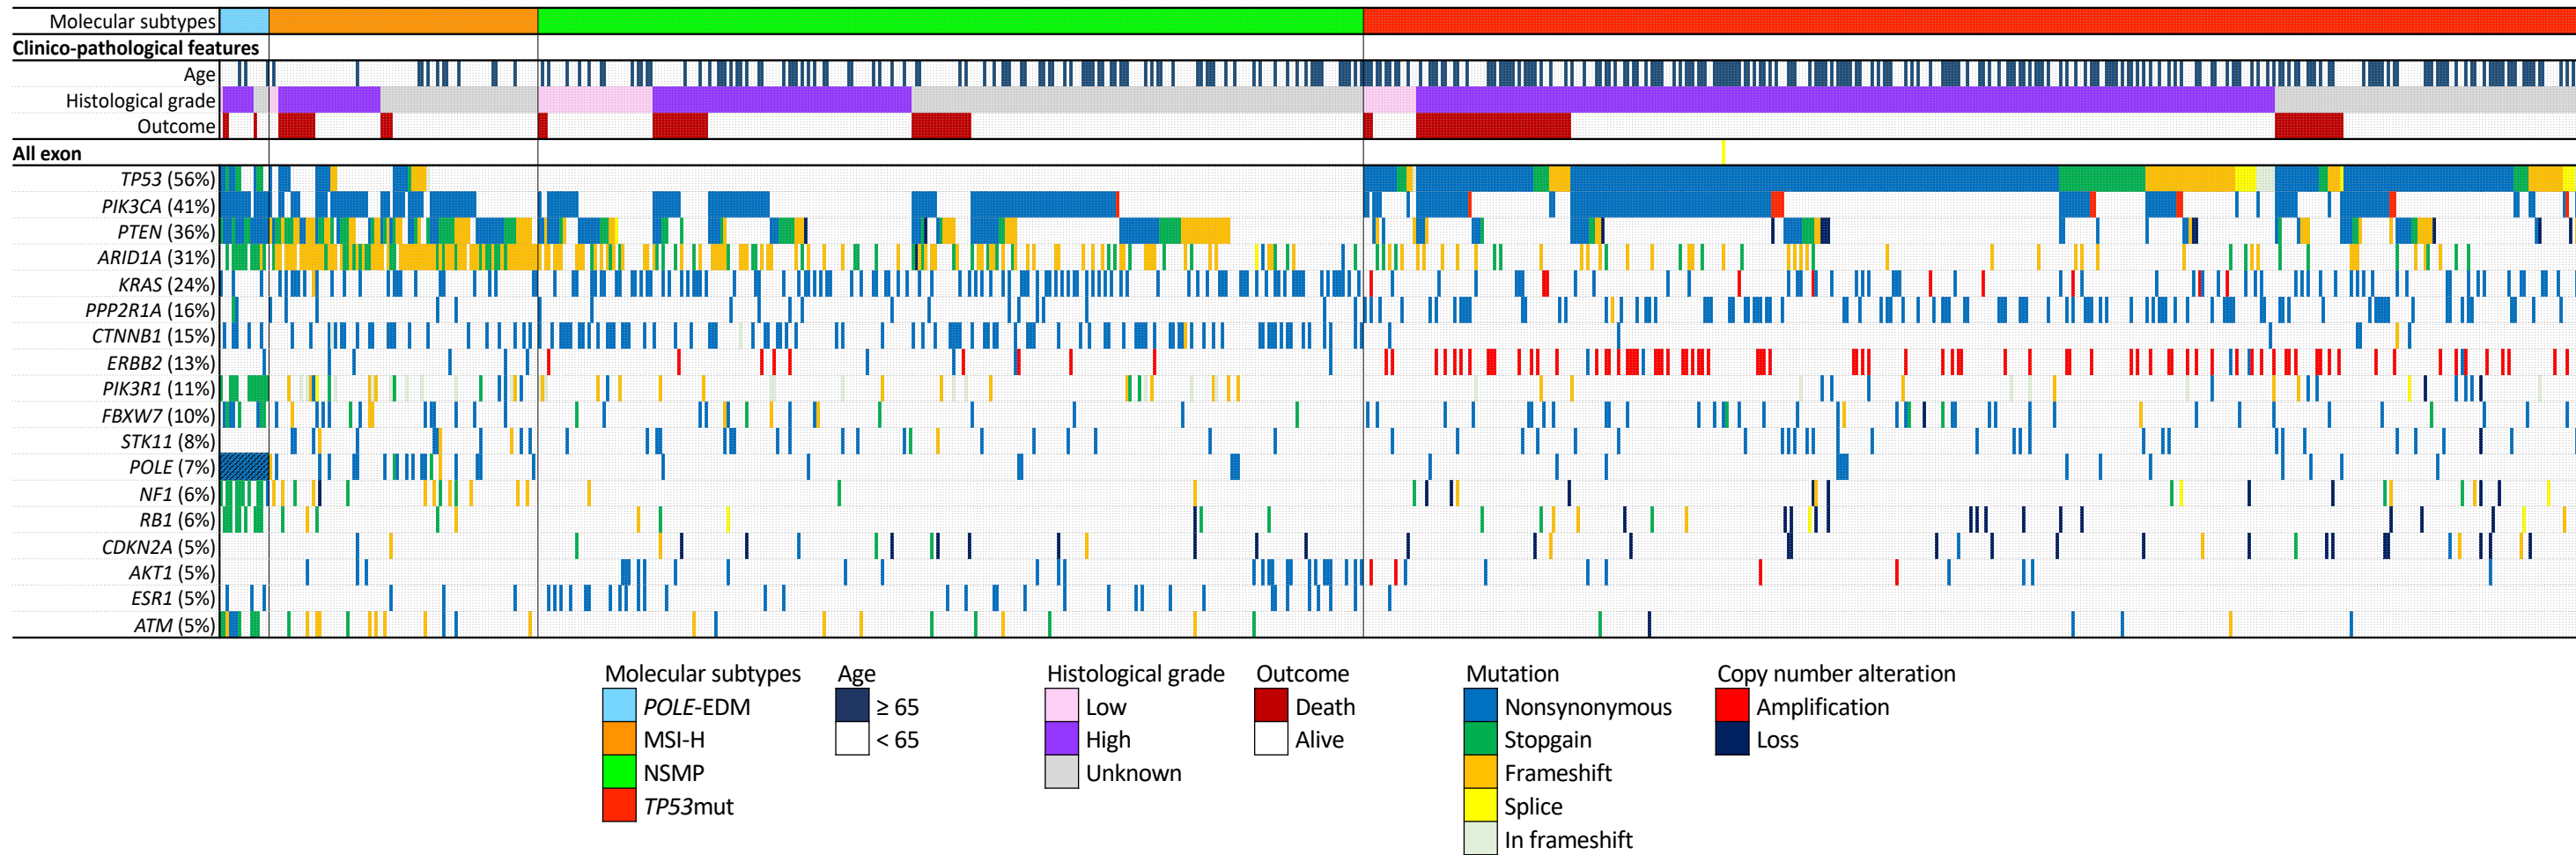

B

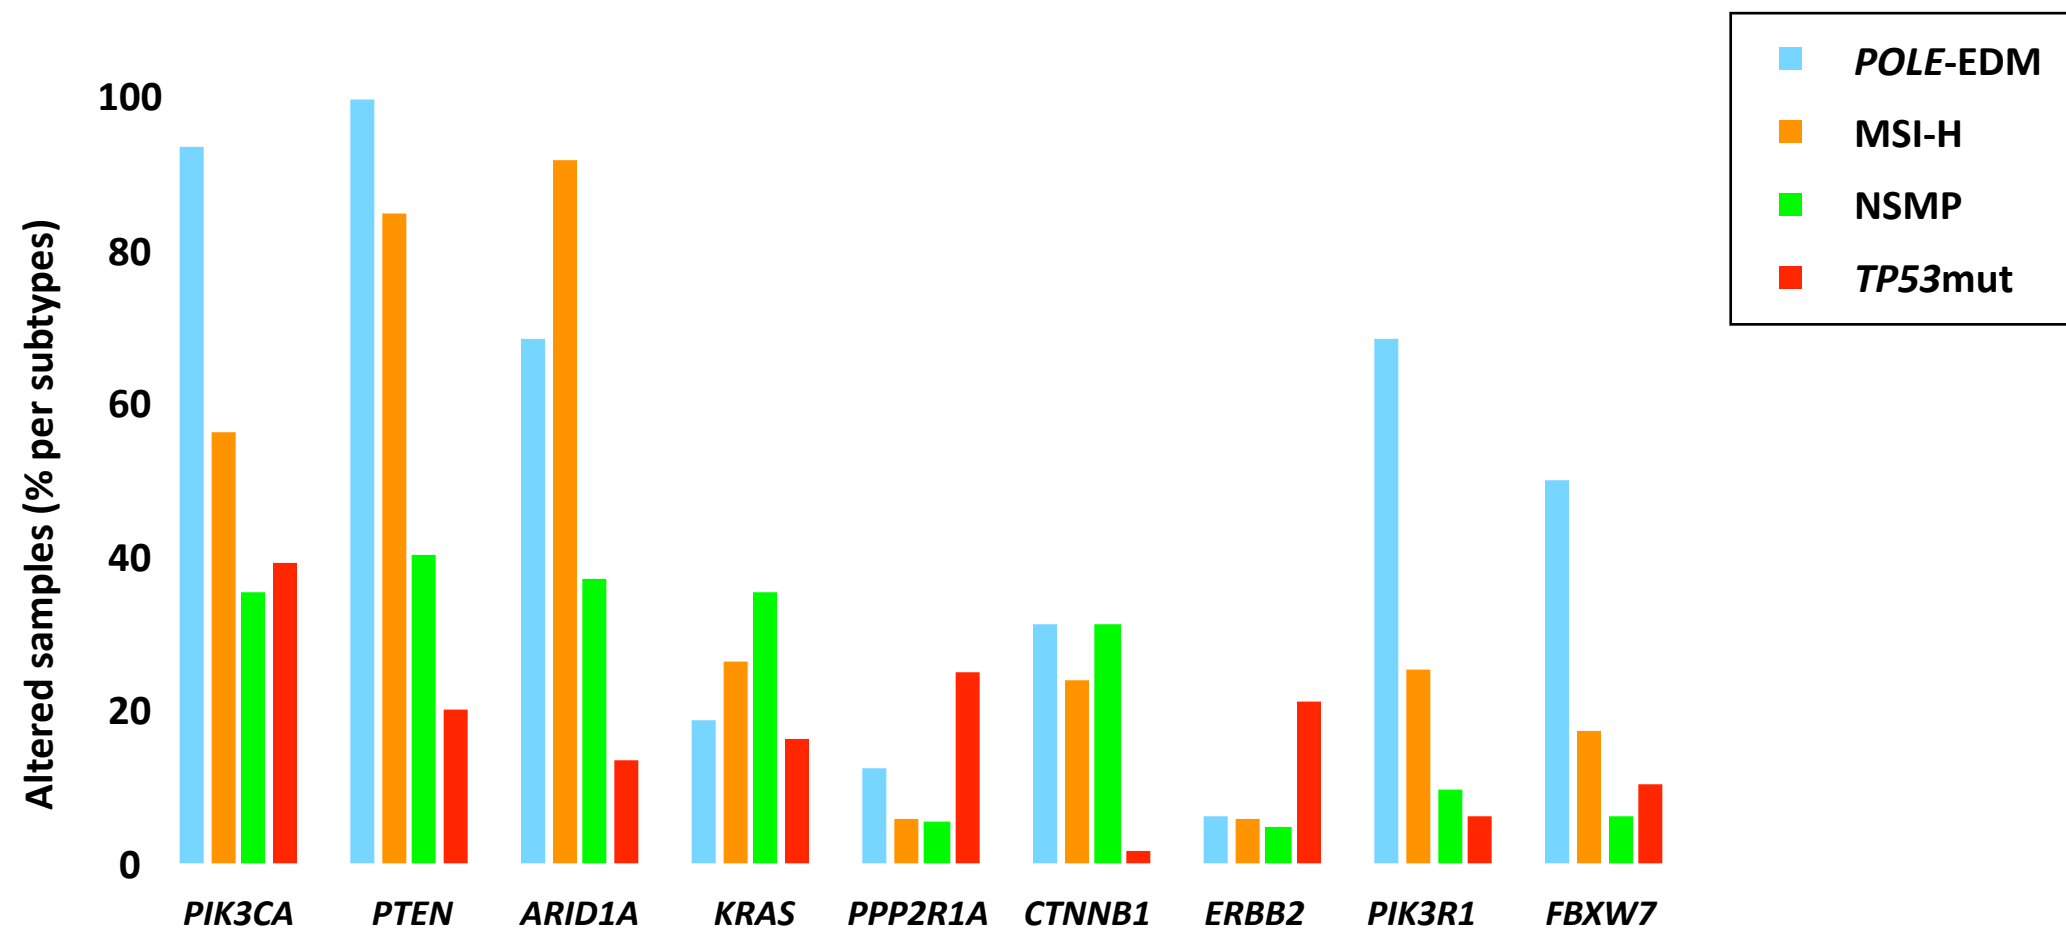

**Supplementary Figure S7. Genetic alteration spectrum by molecular subtype in the C-CAT cohort.**

**A.** Clinicopathological factors and molecular subtype. **B.** Differences among the four subgroups of recurrently mutant genes. Shown are the mutation frequencies of all genes that were significantly mutated in at least one of the four subgroups.

A

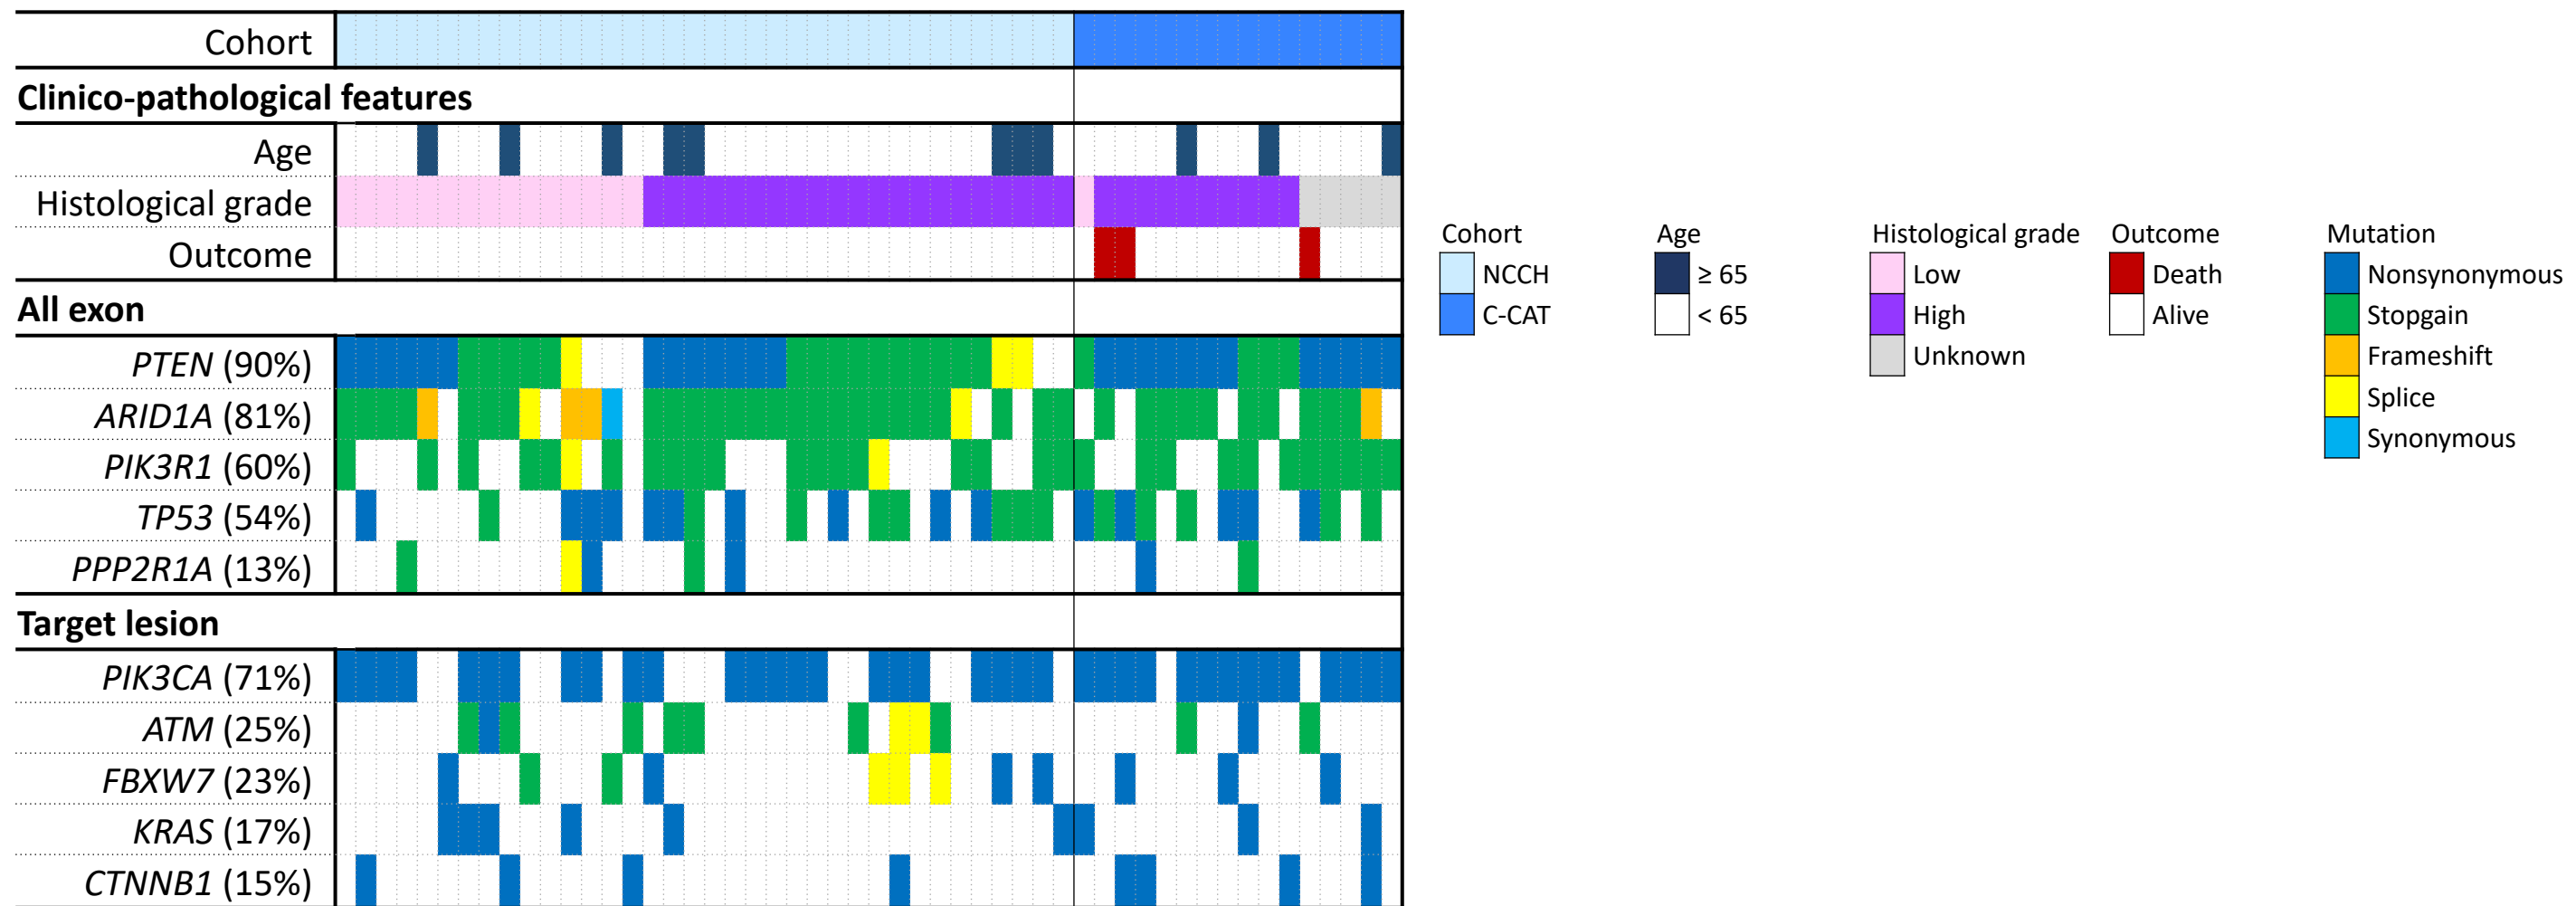

B

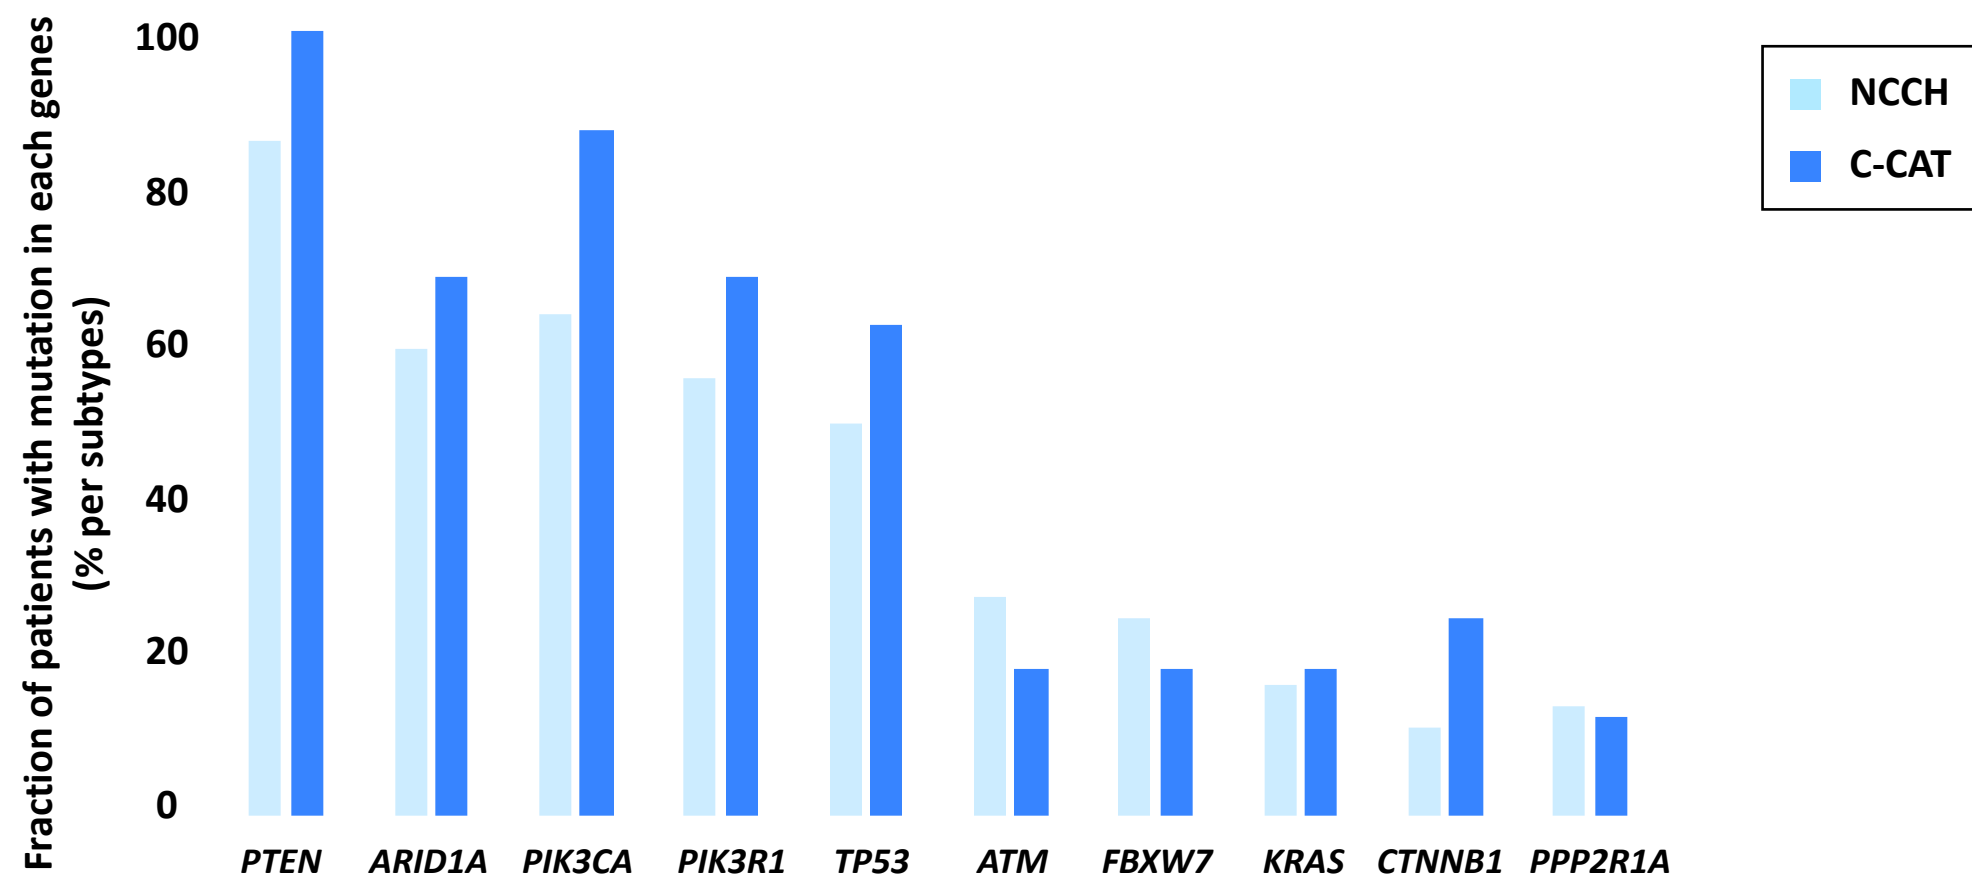

**Supplementary Figure S8. Differences in genetic alterations in endometrial cancer patients classified as *POLE*-EDM in the NCCH and C-CAT cohorts.**

A. Mutation spectrum. B. Differences between the two cohorts of recurrent mutant genes in endometrial cancers with *POLE*-EDM.

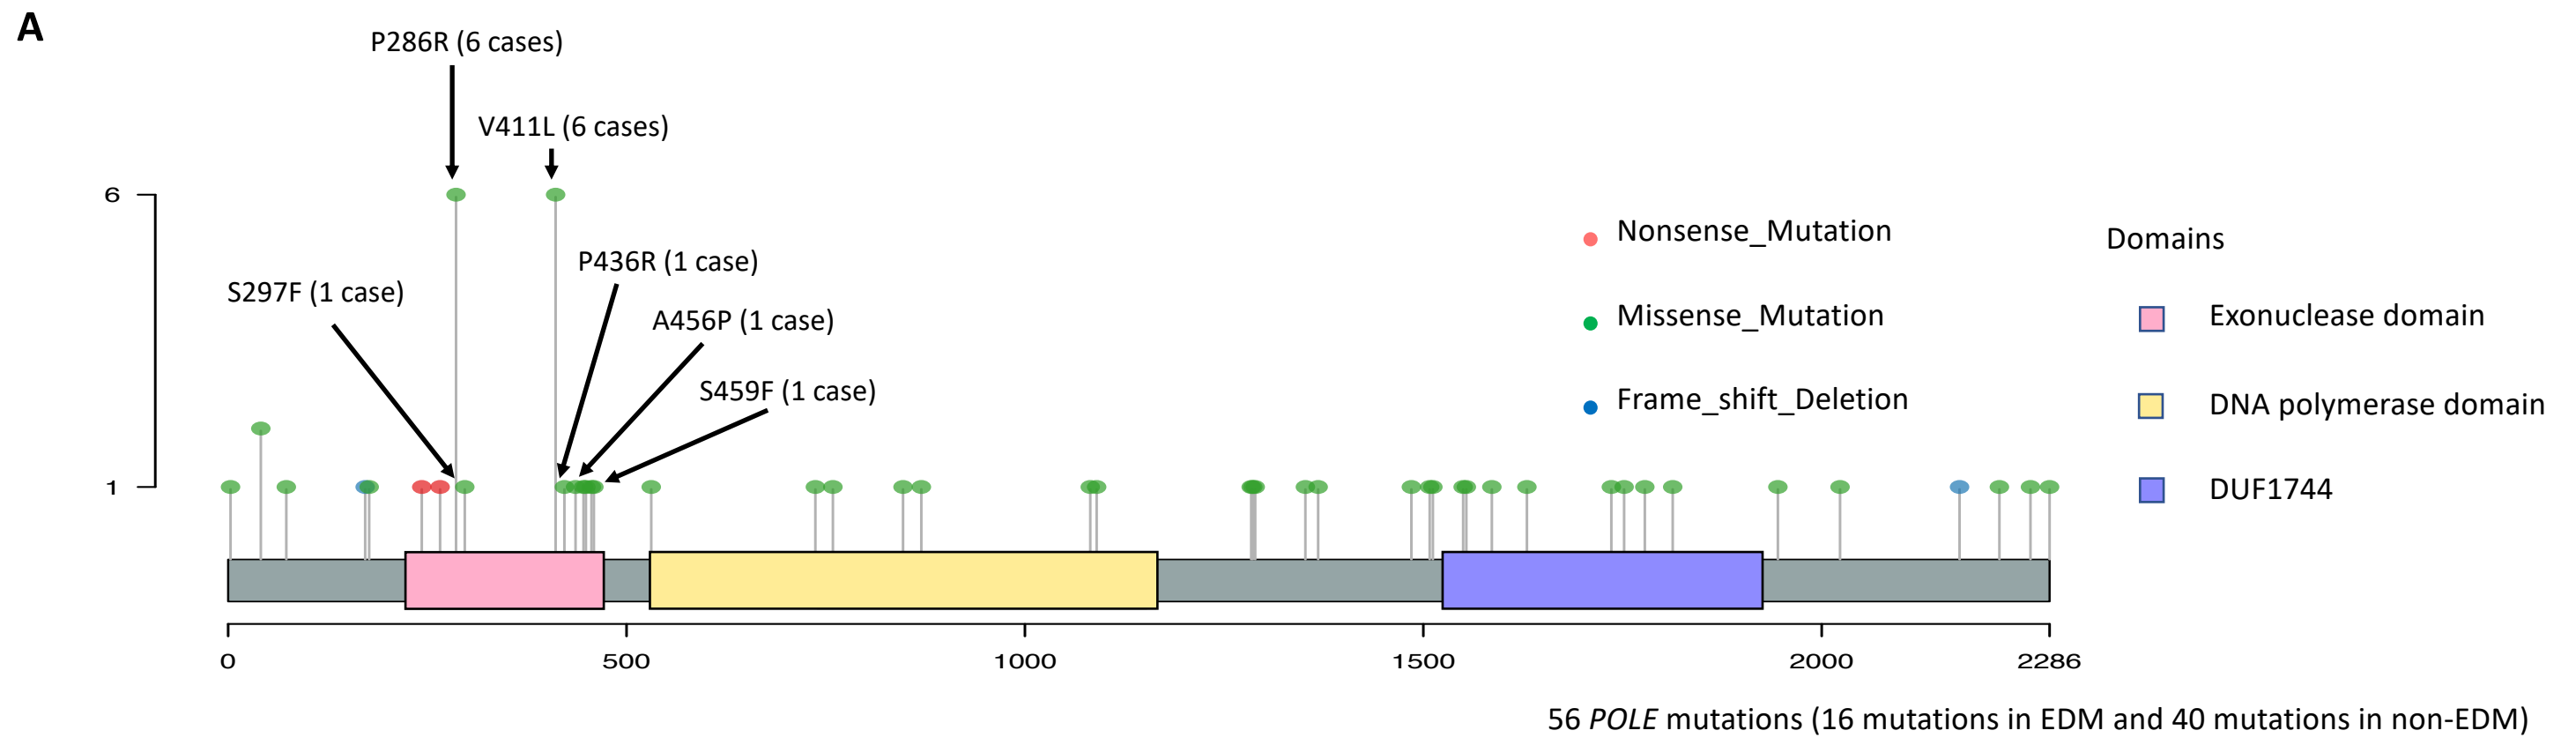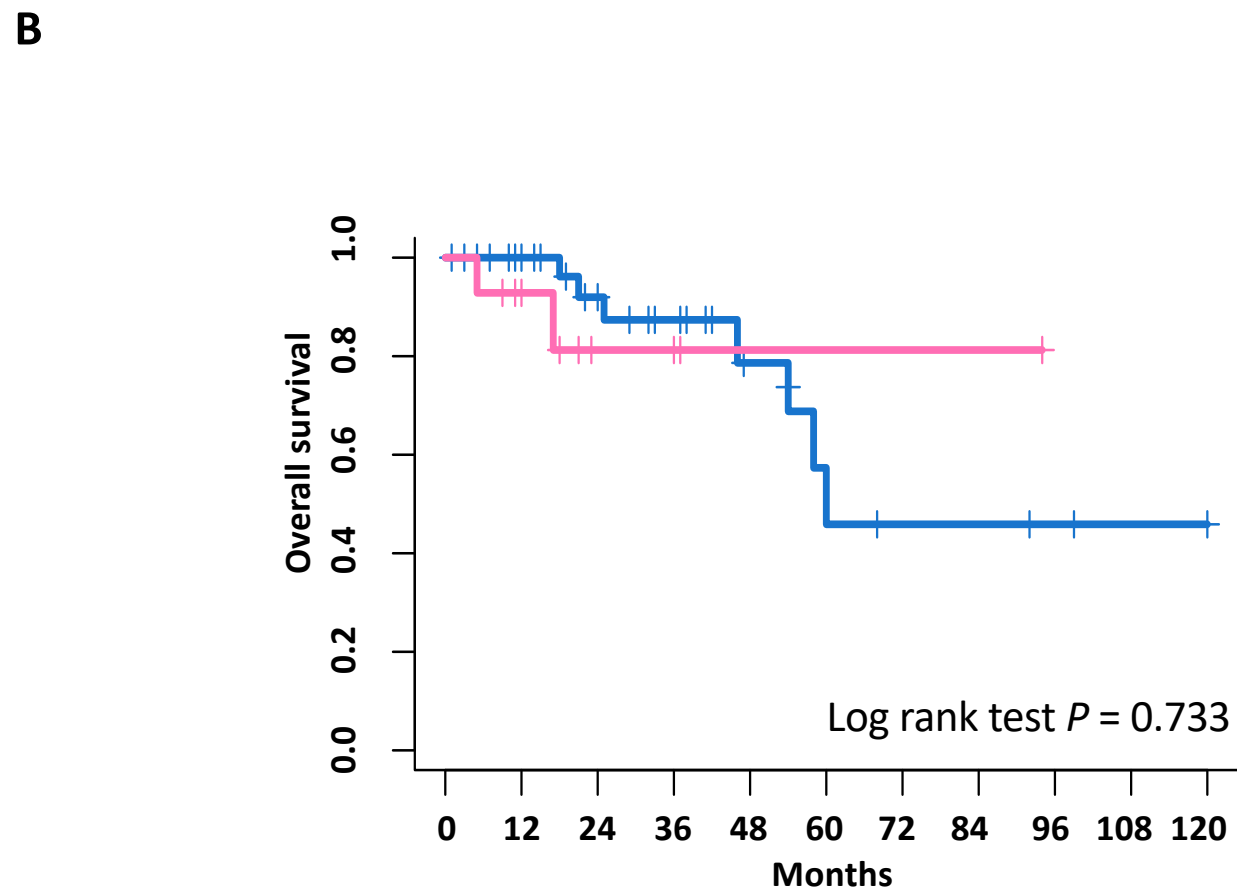

**Supplementary Figure S9. *POLE* variants and patient outcome in the C-CAT cohort.**

**A.** Lollipop plot illustrating all *POLE* variants. **B.** Kaplan–Meier survival curve according to *POLE* mutation status.

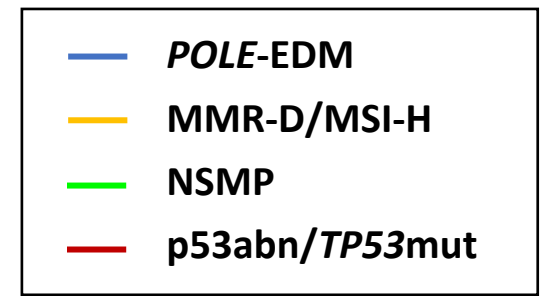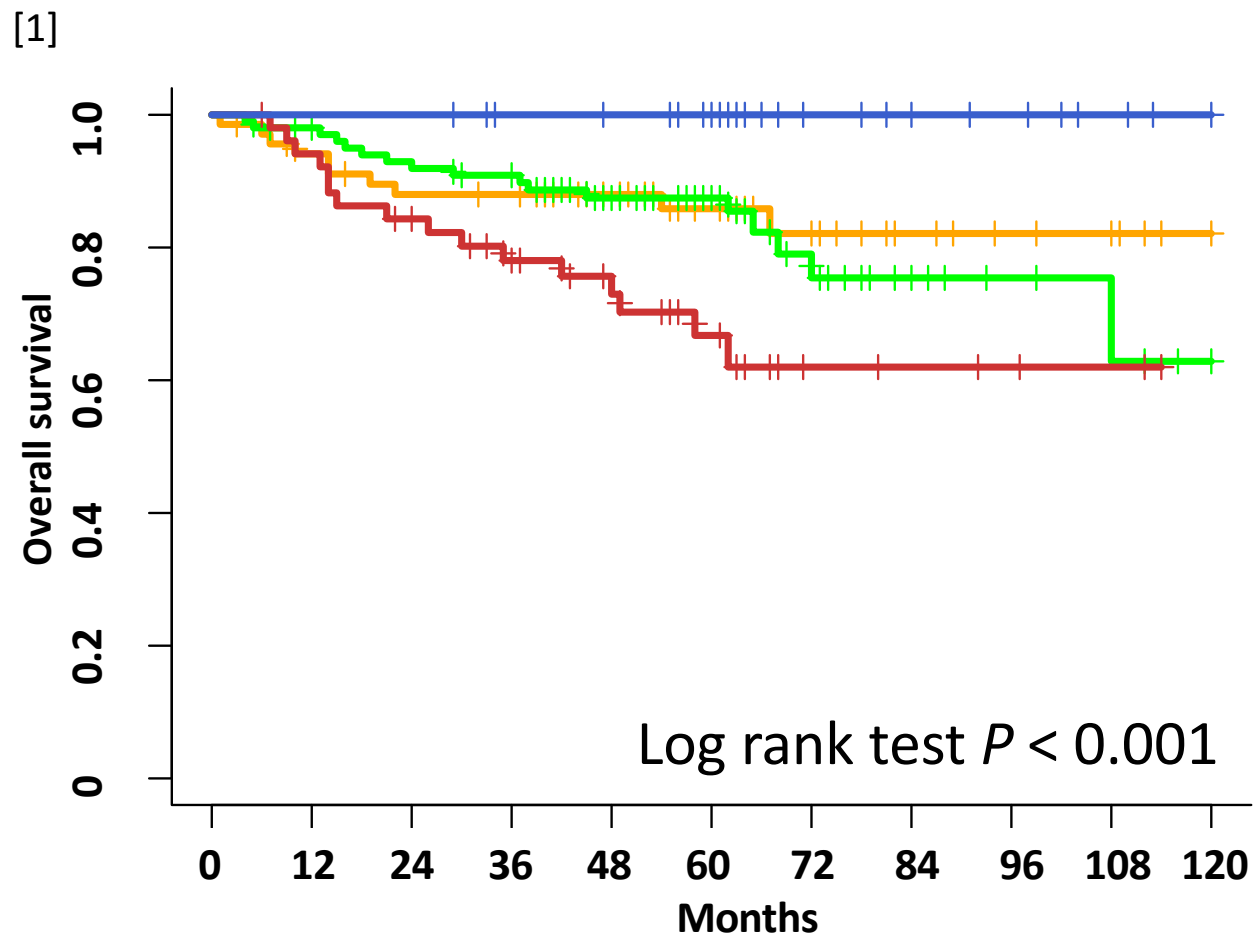

|                 |     |    |    |    |    |   |
|-----------------|-----|----|----|----|----|---|
| <i>POLE-EDM</i> | 36  | 36 | 30 | 10 | 6  | 1 |
| <i>MMR-D</i>    | 69  | 57 | 48 | 22 | 11 | 6 |
| <i>NSMP</i>     | 102 | 91 | 66 | 22 | 7  | 3 |
| <i>p53abn</i>   | 52  | 42 | 28 | 5  | 3  | 0 |

Number at risk

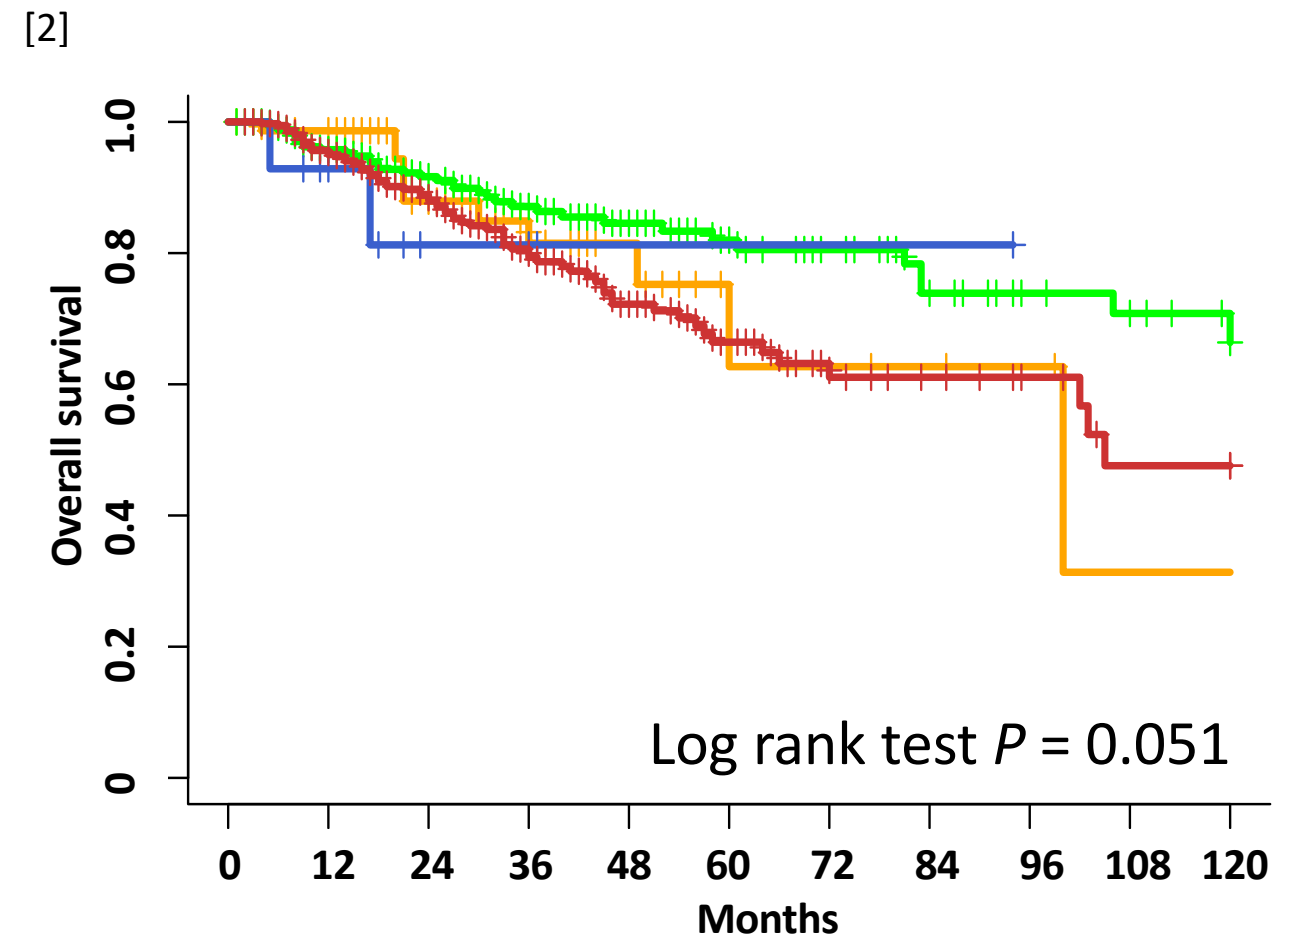

|                 |     |     |    |    |    |    |
|-----------------|-----|-----|----|----|----|----|
| <i>POLE-EDM</i> | 14  | 4   | 1  | 0  | 0  | 0  |
| <i>MSI-H</i>    | 76  | 36  | 13 | 5  | 3  | 1  |
| <i>NSMP</i>     | 252 | 156 | 81 | 44 | 25 | 15 |
| <i>TP53mut</i>  | 376 | 202 | 76 | 29 | 15 | 9  |

Number at risk

**Supplementary Figure S10. Kaplan-Meier survival curves for overall survival according to molecular subtype in both cohorts.**

[1] NCCH cohort and [2] C-CAT cohort.

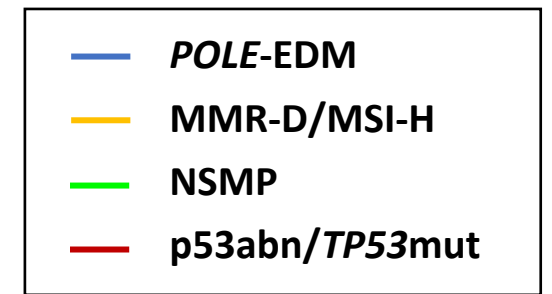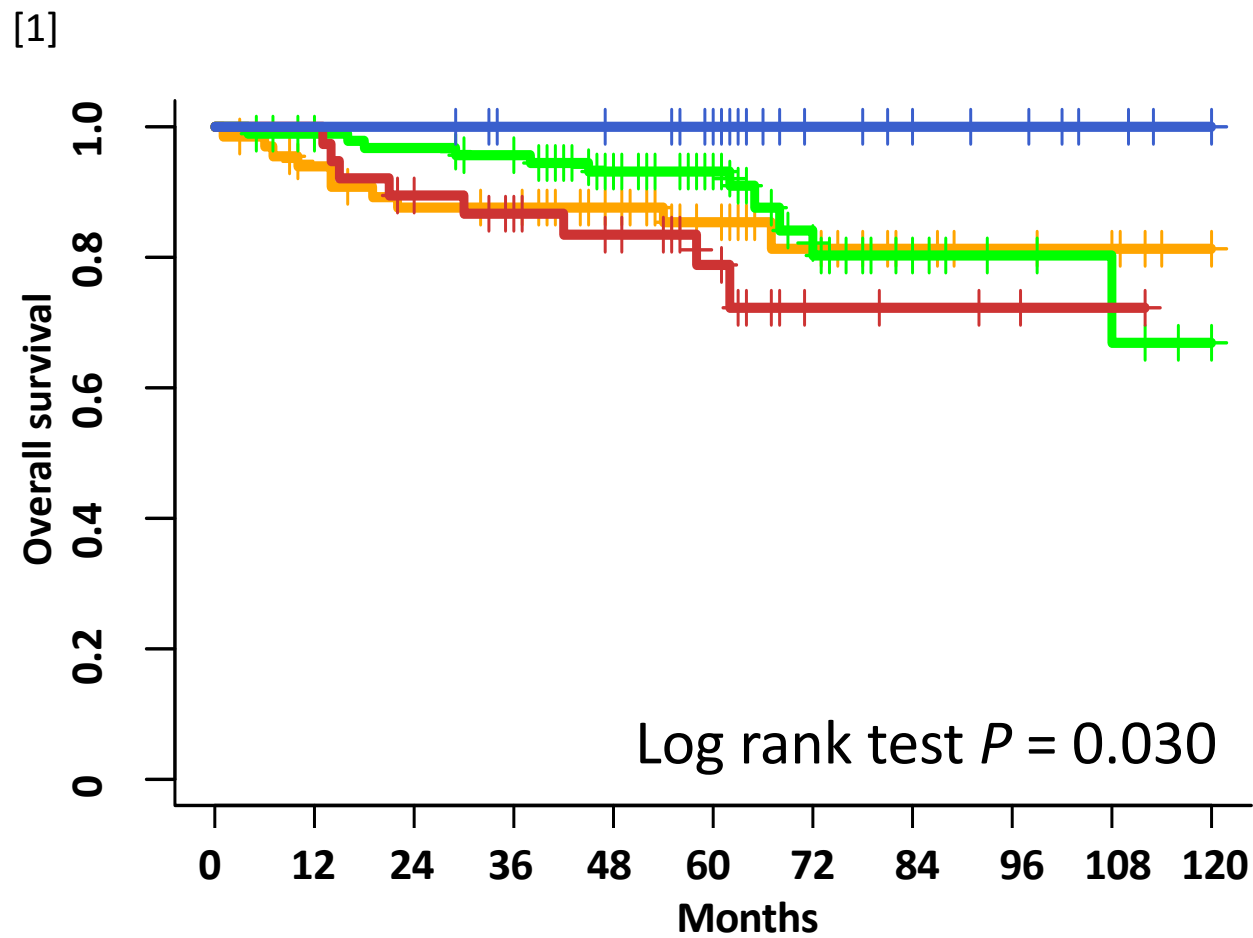

|                 | 0  | 12 | 24 | 36 | 48 | 60 | 72 | 84 | 96 | 108 | 120 |
|-----------------|----|----|----|----|----|----|----|----|----|-----|-----|
| <i>POLE-EDM</i> | 35 | 35 | 29 | 10 | 6  | 1  |    |    |    |     |     |
| <i>MMR-D</i>    | 67 | 55 | 46 | 20 | 11 | 6  |    |    |    |     |     |
| <i>NSMP</i>     | 95 | 88 | 65 | 19 | 7  | 3  |    |    |    |     |     |
| <i>p53abn</i>   | 38 | 32 | 24 | 4  | 2  | 0  |    |    |    |     |     |

Number at risk

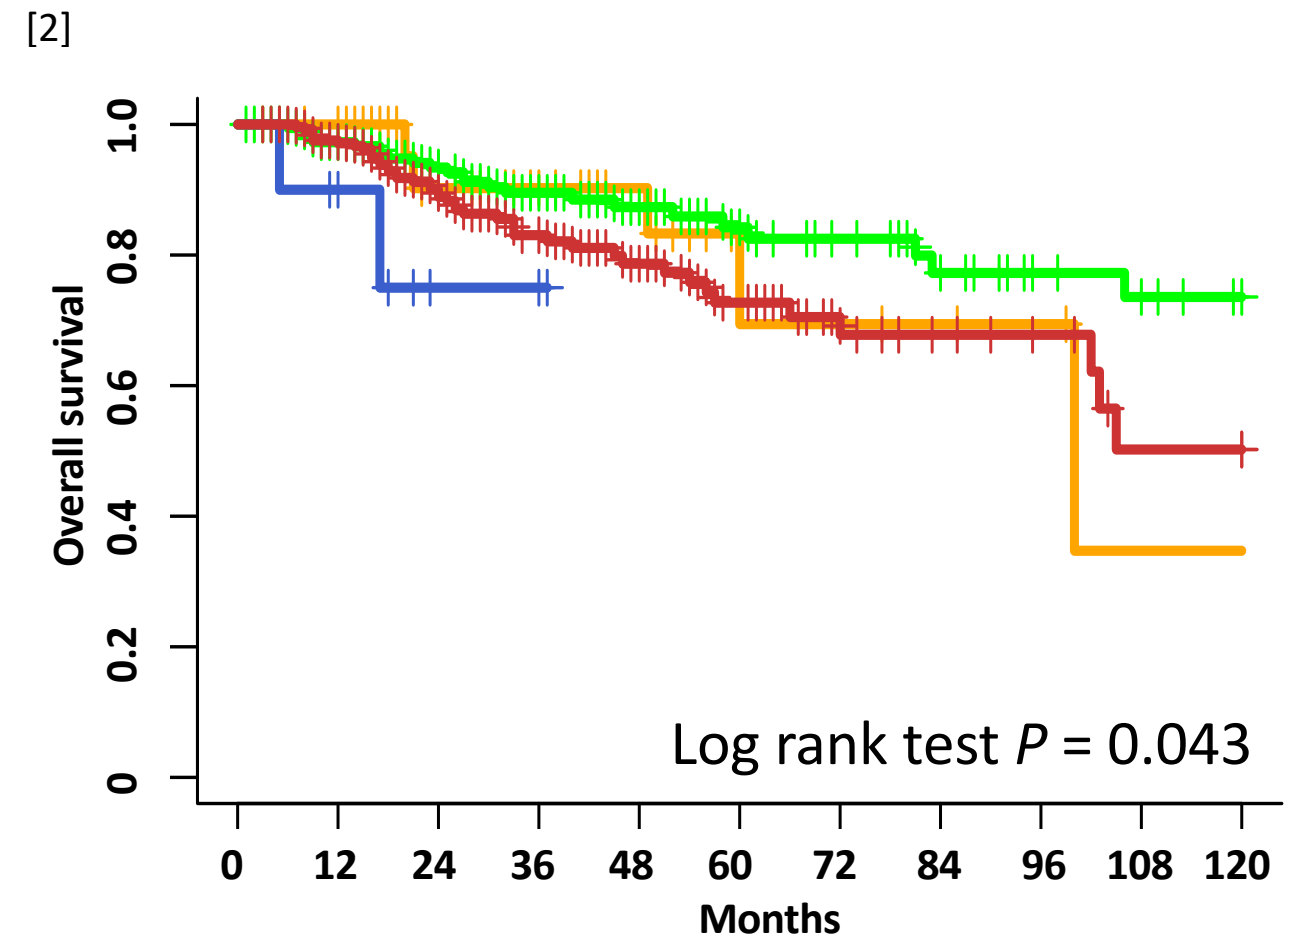

|                 | 0   | 12  | 24 | 36 | 48 | 60 | 72 | 84 | 96 | 108 | 120 |
|-----------------|-----|-----|----|----|----|----|----|----|----|-----|-----|
| <i>POLE-EDM</i> | 10  | 2   | 0  | 0  | 0  | 0  | 0  | 0  | 0  | 0   | 0   |
| <i>MSI-H</i>    | 61  | 33  | 13 | 5  | 3  | 1  |    |    |    |     |     |
| <i>NSMP</i>     | 199 | 130 | 69 | 37 | 21 | 13 |    |    |    |     |     |
| <i>TP53mut</i>  | 255 | 145 | 59 | 24 | 13 | 7  |    |    |    |     |     |

Number at risk

**Supplementary Figure S11. Kaplan-Meier survival curves for overall survival according to molecular subtype excluding carcinosarcoma, un/de-differentiated, and carcinomas with unknown histologic details in both cohorts.**

[1] NCCH cohort and [2] C-CAT cohort.

## Utility of molecular subtypes and genetic alterations for evaluating clinical outcomes in 1,029 patients with endometrial cancer

Asami Y et al.

### Supplementary Figure legends

**Supplementary Figure S1.** Kaplan–Meier survival curve for entire cohort. OS of the C-CAT cohort (black line) and NCCH cohort (red line). RFS of the NCCH cohort (blue line).

C-CAT, the Center for Cancer Genomics and Advanced Therapeutics; NCCH, National Cancer Center Hospital; OS, overall survival; RFS, relapse-free survival.

**Supplementary Figure S2.** Kaplan–Meier survival curves according to molecular subtype at all stages in the NCCH cohort. [1] RFS of the *POLE*-EDM (blue line), MMR-D (orange line), NSMP (green line), and p53abn (red line) groups. [2] OS of the *POLE*-EDM (blue line), MMR-D (orange line), NSMP (green line), and p53abn (red line) groups.

NCCH, National Cancer Center Hospital; RFS, relapse-free survival; OS, overall survival; *POLE*-EDM, DNA polymerase epsilon exonuclease domain mutation; MMR-D, mismatch repair protein deficiency; NSMP, no specific molecular profile; p53abn, protein 53 abnormal expression.

**Supplementary Figure S3.** Kaplan–Meier survival curves according to molecular subtype by FIGO stages in the NCCH cohort. [1] RFS in advanced stages (III–IV) of the *POLE*-EDM (blue line), MMR-D (orange line), NSMP (green line), and p53abn (red line) groups. [2] OS in advanced stages of the *POLE*-EDM (blue line), MMR-D (orange line), NSMP (green line), and p53abn (red line) groups. [3] RFS in the early stages (I–II) of the *POLE*-EDM (blue line), MMR-D (orange line), NSMP (green line), and p53abn (red line) groups. [4] OS in the early stages of the *POLE*-EDM (blue line), MMR-D (orange line), NSMP (green line), and p53abn (red line) groups.

NCCH, National Cancer Center Hospital; RFS, relapse-free survival; OS, overall survival; *POLE*-EDM, DNA polymerase epsilon exonuclease domain mutation; MMR-D, mismatch repair protein deficiency; NSMP, no specific molecular profile; p53abn, protein 53 abnormal expression.

**Supplementary Figure S4.** Kaplan–Meier survival curves according to *PTEN* mutation status in endometrioid endometrial carcinoma patients in the NCCH cohort. [1] RFS of the *PTEN* mutation (red line) and *PTEN* wild type (blue line) groups. [2] OS of the *PTEN* mutation (red line) and *PTEN* wild type (blue line) groups.

NCCH, National Cancer Center Hospital; RFS, relapse-free survival; OS, overall survival; mut, Mutant; wt, Wild type.

**Supplementary Figure S5.** *POLE* variants and patient outcomes in the NCCH cohort. **A.** Lollipop plot illustrating all *POLE* variants. **B.** Kaplan–Meier survival curves according to *POLE* mutation status. [1] RFS of the *POLE*-EDM (pink line) and *POLE*-non EDM (dark blue line) groups. [2] OS of the *POLE*-EDM (pink line) and *POLE*-non EDM (dark blue line) groups.

NCCH, National Cancer Center Hospital; RFS, relapse-free survival; OS, overall survival; *POLE*-EDM, DNA polymerase epsilon exonuclease domain mutation.

**Supplementary Figure S6.** Kaplan–Meier survival curve according to *KRAS* and *ARID1A* status in endometrial cancer patients with no specific molecular profile in the NCCH cohort. OS of the *KRAS* wt and *ARID1A* mutant (navy blue line), *KRAS* mutant and *ARID1A* mutant (dark orange line), *KRAS* wt and *ARID1A* wt (purple line), and *KRAS* mutant and *ARID1A* wt (dark red line) groups.

NCCH, National Cancer Center Hospital; OS, overall survival; mut, Mutant; wt, Wild type.

**Supplementary Figure S7.** Genetic alteration spectrum by molecular subtype in the C-CAT cohort.

**A.** Clinicopathological factors and molecular subtypes in the C-CAT cohort. The 764 patients were classified according to histological type, clinicopathological features, and somatic mutations. **B.** Differences among the four subgroups of recurrent mutant genes. Mutation frequencies of all genes that were significantly mutated in at least one of the four subgroups are shown.

C-CAT, the Center for Cancer Genomics and Advanced Therapeutics; *POLE*-EDM, DNA polymerase epsilon exonuclease domain mutation; MSI-H, microsatellite instability high; NSMP, no specific molecular profile; *TP53*mut, *TP53* mutation.



**Supplementary Figure S8.** Differences in genetic alterations in endometrial cancer patients classified as *POLE*-EDM in the NCCH and C-CAT cohorts. **A.** Mutation spectrum of endometrial cancer patients with *POLE*-EDM. The 52 patients were classified according to histological type, clinicopathological features, and somatic mutations. **B.** Differences between the two cohorts of recurrent mutant genes in endometrial cancer patients with *POLE*-EDM.

*POLE*-EDM: DNA polymerase epsilon exonuclease domain mutation; NCCH, National Cancer Center Hospital; C-CAT, the Center for Cancer Genomics and Advanced Therapeutics.

**Supplementary Figure S9.** *POLE* variants and patient outcomes in the C-CAT cohort. **A.** Lollipop plot illustrating all *POLE* variants. **B.** Kaplan–Meier survival curve according to *POLE* mutation status. OS of the *POLE*-EDM (pink line) and *POLE*-non EDM (dark blue line) groups.

C-CAT, the Center for Cancer Genomics and Advanced Therapeutics; OS, overall survival; *POLE*-EDM, DNA polymerase epsilon exonuclease domain mutation.

**Supplementary Figure S10.** Kaplan–Meier survival curves for overall survival according to molecular subtype in both cohorts. [1] OS of the *POLE*-EDM (blue line), MMR-D (orange line), NSMP (green line), and p53abn (red line) groups in the NCCH cohort. [2] OS of the *POLE*-EDM (blue line), MSI-H (orange line), NSMP (green line), and *TP53*mut (red line) groups in the C-CAT cohort.

NCCH, National Cancer Center Hospital; C-CAT, the Center for Cancer Genomics and Advanced Therapeutics; OS, overall survival; *POLE*-EDM, DNA polymerase epsilon exonuclease domain mutation; MMR-D, mismatch repair deficiency; NSMP, no specific molecular profile; p53abn, protein 53 abnormal expression; MSI-H, microsatellite instability high; *TP53*mut, *TP53* mutation.

**Supplementary Figure S11.** Kaplan–Meier survival curves for overall survival according to molecular subtype excluding carcinosarcoma, un/de-differentiated, and carcinomas with unknown histologic details in both cohorts. [1] OS of the *POLE*-EDM (blue line), MMR-D (orange line), NSMP (green line), and p53abn (red line) groups in the NCCH cohort. [2] OS of the *POLE*-EDM (blue line), MSI-H (orange line), NSMP (green line), and *TP53*mut (red line) groups in the C-CAT cohort.

NCCH, National Cancer Center Hospital; C-CAT, the Center for Cancer Genomics and Advanced Therapeutics; OS, overall survival; *POLE*-EDM, DNA polymerase epsilon exonuclease domain mutation; MMR-D, mismatch repair deficiency; NSMP, no specific molecular profile; p53abn, protein 53 abnormal expression; MSI-H, microsatellite instability high; *TP53*mut, *TP53* mutation.
